## RESEARCH ARTICLE

# ApoE-associated modulation of neuroprotection from A $\beta$ -mediated neurodegeneration in transgenic *Caenorhabditis elegans*

Edward F. Griffin<sup>1,\*</sup>, Samuel E. Scopel<sup>1</sup>, Cayman A. Stephen<sup>1</sup>, Adam C. Holzhauer<sup>1</sup>, Madeline A. Vaji<sup>1</sup>, Ryan A. Tuckey<sup>1</sup>, Laura A. Berkowitz<sup>1</sup>, Kim A. Caldwell<sup>1,2</sup> and Guy A. Caldwell<sup>1,2,‡</sup>

**ABSTRACT**

Allele-specific distinctions in the human apolipoprotein E (*APOE*) locus represent the best-characterized genetic predictor of Alzheimer's disease (AD) risk. Expression of isoform *APOE* $\epsilon$ 2 is associated with reduced risk, while *APOE* $\epsilon$ 3 is neutral and *APOE* $\epsilon$ 4 carriers exhibit increased susceptibility. Using *Caenorhabditis elegans*, we generated a novel suite of humanized transgenic nematodes to facilitate neuronal modeling of amyloid-beta peptide (A $\beta$ ) co-expression in the context of distinct human *APOE* alleles. We found that co-expression of human *APOE* $\epsilon$ 2 with A $\beta$  attenuated A $\beta$ -induced neurodegeneration, whereas expression of the *APOE* $\epsilon$ 4 allele had no effect on neurodegeneration, indicating a loss of neuroprotective capacity. Notably, the *APOE* $\epsilon$ 3 allele displayed an intermediate phenotype; it was not neuroprotective in young adults but attenuated neurodegeneration in older animals. There was no functional impact from the three *APOE* isoforms in the absence of A $\beta$  co-expression. Pharmacological treatment that examined neuroprotective effects of *APOE* alleles on calcium homeostasis showed allele-specific responses to changes in ER-associated calcium dynamics in the A $\beta$  background. Additionally, A $\beta$  suppressed survival, an effect that was rescued by *APOE* $\epsilon$ 2 and *APOE* $\epsilon$ 3, but not *APOE* $\epsilon$ 4. Expression of the *APOE* alleles in neurons, independent of A $\beta$ , exerted no impact on survival. Taken together, these results illustrate that *C. elegans* provides a powerful *in vivo* platform with which to explore how AD-associated neuronal pathways are modulated by distinct *APOE* gene products in the context of A $\beta$ -associated neurotoxicity. The significance of both ApoE and A $\beta$  to AD highlights the utility of this new pre-clinical model as a means to dissect their functional inter-relationship.

This article has an associated First Person interview with the first author of the paper.

**KEY WORDS:** ApoE, A $\beta$ , Neurodegeneration, Alzheimer's disease, *C. elegans*

<sup>1</sup>Department of Biological Sciences, The University of Alabama, Box 870344, Tuscaloosa, AL 35487-0344, USA. <sup>2</sup>Departments of Neurology and Neurobiology, Center for Neurodegeneration and Experimental Therapeutics, Nathan Shock Center for Research on the Basic Biology of Aging, University of Alabama at Birmingham School of Medicine, Birmingham, AL 35294, USA.

\*Present address: CIRC 516, 1720 2nd Ave S, Birmingham, AL 35294-0017, USA.

‡Author for correspondence (gcaldwel@ua.edu)

 G.A.C., 0000-0002-8283-9090

This is an Open Access article distributed under the terms of the Creative Commons Attribution License (<https://creativecommons.org/licenses/by/4.0>), which permits unrestricted use, distribution and reproduction in any medium provided that the original work is properly attributed.

Received 18 September 2018; Accepted 17 January 2019

**INTRODUCTION**

Alzheimer's disease (AD), characterized by the formation of insoluble amyloid-beta peptide (A $\beta$ ) plaques in the brain, accounts for nearly 70% of all late-life dementia. Although the causes, whether genetic or environmental, are not clearly defined, it is evident that the most predictive genetic association is variation in the gene encoding apolipoprotein E (ApoE). Although estimates vary based on study and ethnicity, ~40% of AD cases harbor the  $\epsilon$ 4 allele of *APOE* (Spinney, 2014). This allele is a significant risk factor for late-onset AD, where two copies of *APOE* $\epsilon$ 4 increases AD risk up to 15-fold relative to *APOE* $\epsilon$ 3. The *APOE* $\epsilon$ 2 allele appears to provide protection against AD via a mechanism that consists of more than the absence of the *APOE* $\epsilon$ 4 allele (Corder et al., 1994; Talbot et al., 1994). Indeed, there may be opposing actions of the *APOE* $\epsilon$ 2 and *APOE* $\epsilon$ 4 alleles, which would not be unprecedented, as *APOE* $\epsilon$ 2 and *APOE* $\epsilon$ 4 appear to have opposing activities in lipidation and aggregate stabilization (Hu et al., 2015). Despite this correlation, the mechanisms by which differences in *APOE* allelic function modify AD risk are not entirely understood.

There are many mechanisms proposed to explain how *APOE* $\epsilon$ 4 increases AD risk, including altered glucose and lipid metabolism. Most commonly, however, A $\beta$ -dependent effects are considered within the context of the *APOE* alleles, where neurotoxicity and aggregation are examined. For example, mammalian models have yielded significant information on how ApoE and A $\beta$  interact to affect cellular function and animal behavior, but the scale and complexity of the mammalian nervous system frustrate examination of quantifiable effects on individual neurons and their functional connectivity. The nematode *Caenorhabditis elegans* has been employed to generate models of neurodegenerative disorders, including AD (Griffin et al., 2017), Huntington's disease (Muñoz-Lobato et al., 2014) and Parkinson's disease (Martinez et al., 2017a). Because *C. elegans* is the only animal for which a connectivity map of its entire nervous system exists, it provides an unparalleled platform for the examination and quantitative characterization of neural interactions. Further, the genetic tractability of *C. elegans* offers a model receptive to genetic manipulation and transgenics. Importantly, specific worm models have proven highly predictive of both genetic and small molecule modifier results obtained in mammalian systems, including genome-wide association studies and induced pluripotent stem cells from patients (Cooper et al., 2006; Matlack et al., 2014; Mazzulli et al., 2011; Su et al., 2010; Tardiff et al., 2013, 2017; Treusch et al., 2011).

Here, we present new neuronal models to assay ApoE activity *in vivo* that consist of nematodes expressing human *APOE* $\epsilon$ 2, *APOE* $\epsilon$ 3 or *APOE* $\epsilon$ 4 along with A $\beta$ . Glutamate is a major excitatory neurotransmitter in the brain, and dysregulation of the glutamatergic system can lead to excitotoxicity, which, when chronic, has been

hypothesized to play a role in neurodegeneration (Lewerenz and Maher, 2015). Because the glutamatergic circuitry is severely disrupted in the brains of AD patients (Francis et al., 1993; Greenamyre et al., 1988), the *eat-4* (glutamate transporter) promoter was chosen for glutamatergic neuron-specific expression of A $\beta$  and the respective *APOE* alleles. Effects on neuronal integrity were examined through quantitative fluorescent imaging of neurodegeneration and behavioral assays. Additionally, we modulated neurodegenerative effectors via pharmacological treatment and RNA interference (RNAi). By combining neuronal expression of *APOE* alleles with a transgenic nematode model of human A $\beta$  toxicity, we can further understand the clinically significant relationship between ApoE and A $\beta$  in neurotoxicity. Using these *C. elegans* models of progressive A $\beta$ -mediated neurodegeneration, a strong attenuation of A $\beta$ -mediated toxicity is revealed by the *APOE $\epsilon$ 2* allele, as well as a modest, yet significant, intermediate protection phenotype by *APOE $\epsilon$ 3* as animals age, *in vivo*. Strikingly, the neuroprotective activity of ApoE was abolished in animals co-expressing A $\beta$  and *APOE $\epsilon$ 4*. Furthermore, this shows that the allelic profile reflects the well-established clinical observation of ApoE-associated susceptibility. Pharmacological and post-transcriptional manipulation further demonstrate differential activities of *APOE* alleles observable through multiple phenotypic outputs. Though limited as an invertebrate system, *C. elegans* provides a platform that accelerates attainment of a more mechanistic understanding of how ApoE protein variants function to modulate neuronal degeneration and establishes a new pre-clinical model of AD to accelerate future drug discovery.

## RESULTS

### ***APOE* allele-selective mitigation of A $\beta$ -mediated neurodegeneration**

The A $\beta$  peptide is the product of sequential cleavage of the amyloid precursor protein (APP) either at the cell surface or within endosomes. Cleavage of APP is known to produce multiple peptide products, such as A $\beta$ (1-40) and A $\beta$ (1-42); however, the A $\beta$ (1-42) peptide is the most toxic. Extracellular deposition of insoluble A $\beta$  plaques is a pathological hallmark of AD, but intracellular A $\beta$  has been shown to be far more toxic (Burdick et al., 1992; Cha et al., 2012; Esbjörner et al., 2014; Hu et al., 2009; Kounnas et al., 1995; Li et al., 2012; Liu et al., 2013b; Naj et al., 2011; Nakagawa et al., 2000; Okoshi et al., 2015; Reinders et al., 2016; Snyder et al., 2005; Takahashi et al., 2002; Treusch et al., 2011; Ulrich, 2015; Wang et al., 2000; Yang et al., 1998; Zhao et al., 2015). To reproduce the intracellular accumulation of A $\beta$  in *C. elegans*, A $\beta$  was cloned with promoters for tissue-specific multicopy expression and scored for toxicity. In *C. elegans* muscle expression models of A $\beta$  toxicity, A $\beta$  was found to form plaques (Link et al., 2001) and intramuscular inclusions (Fay et al., 1998; Link, 1995), and to induce paralysis via cytotoxicity (Dostal and Link, 2010; Fonte et al., 2002). Furthermore, we have shown that expression of A $\beta$  in glutamatergic neurons results in progressive, age-dependent, neurodegeneration modulated by endocytic and endosomal regulators, including the established AD modifier PICALM (Griffin et al., 2018; Treusch et al., 2011), and is amenable to pharmacological treatment (Matlack et al., 2014; Tardiff et al., 2017). To examine the relationship between ApoE and A $\beta$ , we utilized a *C. elegans* model in which an A $\beta$ (1-42) construct, hereafter referred to as A $\beta$ , was cloned for expression in the glutamatergic neurons and neurodegeneration was quantified with precision in the five glutamatergic neurons in the tail (Matlack et al., 2014; Treusch et al., 2011). Expression in the glutamatergic neurons

was achieved using the promoter for the glutamate transporter *eat-4*, which does not significantly change in expression across larval stages (Lee et al., 1999).

To model ApoE activity in *C. elegans*, complementary DNAs (cDNAs) encoding the three distinct human *APOE* alleles (*APOE $\epsilon$ 2*, *APOE $\epsilon$ 3* and *APOE $\epsilon$ 4*) were recombined with the artificial constitutive *her-1* secretion signal, and expression was driven by the glutamatergic neuron-specific *eat-4* promoter. These three constructs were microinjected into wild-type (N2) animals, integrated into the genome and crossed with A $\beta$ -expressing animals after outcrossing. Overexpression of A $\beta$  induced neurodegeneration of glutamatergic neurons (Fig. 1A), as has been observed previously (Griffin et al., 2018; Tardiff et al., 2017; Treusch et al., 2011), while expression of *APOE $\epsilon$ 2*, *APOE $\epsilon$ 3* or *APOE $\epsilon$ 4* in glutamatergic neurons did not impact neurodegeneration in the absence of A $\beta$  (Fig. 1A).

Because the  $\epsilon$ 2 allele is associated with protective phenotypes (Bu, 2009; Liu et al., 2013a), we hypothesized that co-expression of *APOE $\epsilon$ 2* with A $\beta$  would attenuate A $\beta$ -induced neurodegeneration. At both days 3 and 7 post-hatching, nearly 100% of all animals expressing GFP alone have all five normal glutamatergic neurons. However, when co-expressed with A $\beta$ , the *APOE $\epsilon$ 2* allele suppressed A $\beta$ -mediated neurodegeneration by ~30% at days 3 and 7 post-hatching (Fig. 1B,C). Furthermore, because the *APOE $\epsilon$ 3* allele appears functionally neutral in humans, and  $\epsilon$ 4 is associated with increased neurotoxicity (Bu, 2009; Corder et al., 1993; Huang and Mucke, 2012; Liu et al., 2013a), we hypothesized that *APOE $\epsilon$ 3* would elicit marginal or no neuroprotective effect, while *APOE $\epsilon$ 4* would increase neurodegeneration. At day 3, there was no statistically significant difference in neurodegeneration between animals expressing A $\beta$  alone or co-expressing *APOE $\epsilon$ 3*, but, at day 7, *APOE $\epsilon$ 3* significantly reduced A $\beta$ -mediated neurodegeneration by ~10%, which was significantly less than the protection afforded by *APOE $\epsilon$ 2*. This protection was also significantly greater than that provided by the ApoE $\epsilon$ 4 strain, in which there was no change in neurodegeneration at either day 3 or day 7 (Fig. 1B,C). Although co-expression with *APOE $\epsilon$ 4* did not enhance neurodegeneration in this model, it was not statistically different from A $\beta$  alone at days 3 or 7 ( $P=0.9579$ ,  $P=0.9369$ , respectively), but was significantly different from the A $\beta$ +ApoE $\epsilon$ 2 strain at day 7, thereby confirming earlier reports that there may be alternative mechanisms of action between these two alleles (Corder et al., 1994; Talbot et al., 1994).

As a secondary readout for glutamatergic neuronal dysfunction, we turned to a behavioral assay, as altered mechanosensory touch response is indicative of glutamatergic neuron dysfunction. In *C. elegans*, a pair of glutamatergic tail neurons have processes extending from the tail to the mid-body, to control forward escape in response to posterior gentle touch (Chalfie et al., 1985). In worms expressing A $\beta$  in glutamatergic neurons, this posterior gentle touch response is defective (Fig. 1D). However, in worms expressing *APOE* alleles without A $\beta$ , gentle touch response is not defective, indicating that the *APOE* alleles on their own are not pathogenic (Fig. 1D). When worms co-overexpressing A $\beta$  and ApoE $\epsilon$ 2 were assayed in the touch response assay, there was a significant mitigation of this mechanosensory defect (Fig. 1E). Recovery was not observed by ApoE $\epsilon$ 3 or ApoE $\epsilon$ 4 co-expression since they were not significantly reduced compared with the A $\beta$ +ApoE $\epsilon$ 2 strain (Fig. 1E). These data also suggest that, since there is a significant difference between A $\beta$ +ApoE $\epsilon$ 2 and A $\beta$  alone, but not between A $\beta$  alone and either the A $\beta$ +ApoE $\epsilon$ 3 or A $\beta$ +ApoE $\epsilon$ 4 strains, there might be alternative

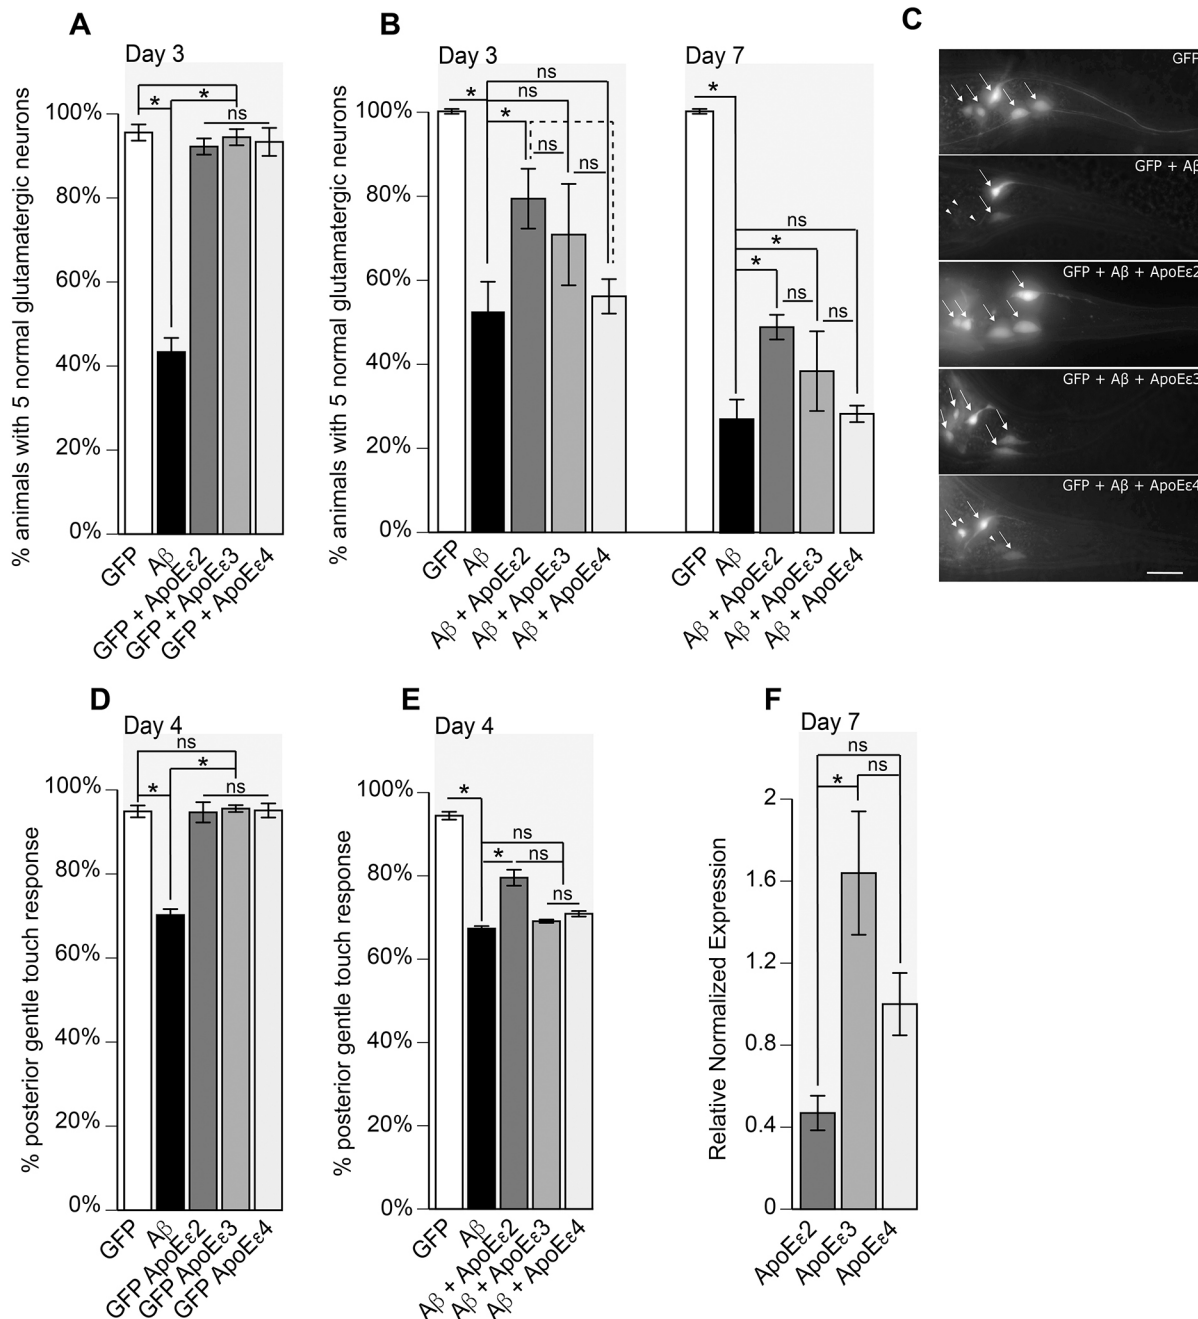

Fig. 1. See next page for legend.

mechanisms of action among these alleles that can be teased out using this assay. For example, although A $\beta$ +ApoE $\epsilon$ 3 appeared to have a neuroprotective effect at later stages (day 7; Fig. 1B), the seemingly protected neurons in animals co-expressing ApoE $\epsilon$ 3 demonstrated reduced mechanosensory sensitivity. This suggests that ApoE $\epsilon$ 3 may confer moderate protection of neuronal structure that does not ameliorate loss of neuronal function by A $\beta$ .

To ensure that the *APOE*-allele-specific phenotypes we observed are functionally driven and are not simply due to transgenic expression level differences, *APOE* $\epsilon$ 2, *APOE* $\epsilon$ 3 and *APOE* $\epsilon$ 4 mRNA levels were quantified by reverse-transcription quantitative polymerase chain reaction (RT-qPCR; Fig. 1F). There were no statistically significant differences in relative normalized *APOE* transcripts between ApoE $\epsilon$ 2 and ApoE $\epsilon$ 4 samples ( $P=0.2107$ ) or ApoE $\epsilon$ 3 and ApoE $\epsilon$ 4 samples

( $P=0.1280$ ). However, *APOE* $\epsilon$ 3 transcripts were significantly higher than *APOE* $\epsilon$ 2 transcripts ( $P=0.0127$ ). Taken together with the neurodegeneration analyses, these results indicate that ApoE $\epsilon$ 2 neuroprotection is likely not due to disproportionate overexpression compared with ApoE $\epsilon$ 3.

#### ***APOE*-allele-specific modulation of calcium homeostasis**

To observe whether ApoE confers a physiologically relevant effect in our model, we examined the relationship between calcium homeostasis, A $\beta$  and ApoE. In rat hippocampal neurons and chick sympathetic ganglia, ApoE $\epsilon$ 2 and ApoE $\epsilon$ 3 have no effect on *N*-methyl-D-aspartate (NMDA)-mediated calcium influx, but incubation with ApoE $\epsilon$ 4 results in massive NMDA-mediated calcium influx (Hartmann et al., 1994; Qiu et al., 2003; Tolar

### Fig. 1. Overexpression of A $\beta$ induces neurodegeneration that is mitigated by ApoE2 and ApoE3, but not ApoE4.

(A) Expression of GFP from the *eat-4* promoter {strain DA1240(*adls1240[P<sub>eat-4</sub>::GFP+lin-15(+)]*)} illuminates the glutamatergic neurons. The five tail glutamatergic neurons are assayed for neurodegeneration. Glutamatergic co-expression of A $\beta$  {UA198(*baln34[P<sub>eat-4</sub>::A $\beta$ ,P<sub>myo-2</sub>::mCherry]*); *adls1240[P<sub>eat-4</sub>::GFP]*} induces neurodegeneration in synchronized hermaphrodite populations at day 3 post-hatching ( $P<0.0001$ ), while overexpression of *APOE2* {UA356 (*adls1240[P<sub>eat-4</sub>::GFP+lin-15(+)]*); *baln50[P<sub>eat-4</sub>::APOE2, P<sub>unc-54</sub>::tdTomato]*}, *APOE3* {UA357 (*adls1240[P<sub>eat-4</sub>::GFP+lin-15(+)]*); *baln51[P<sub>eat-4</sub>::APOE3, P<sub>unc-54</sub>::tdTomato]*} or *APOE4* {UA358 (*adls1240[P<sub>eat-4</sub>::GFP+lin-15(+)]*); *baln52[P<sub>eat-4</sub>::APOE4, P<sub>unc-54</sub>::tdTomato]*} in the absence of A $\beta$  results in no difference from GFP expression only ( $P=0.5391$ ,  $P=0.9823$ ,  $P=0.8248$ , respectively). There was also no difference between *APOE2* and *APOE3* ( $P=0.8255$ ), *APOE2* and *APOE4* ( $P=0.9824$ ), or *APOE3* and *APOE4* ( $P=0.9825$ ).  $n=90$  for each strain; one-way ANOVA with Tukey's post hoc test. These data are reported as mean $\pm$ s.e.m. All nematodes were grown at 20°C.

(B) Animals expressing GFP alone display no neurodegeneration at days 3 or 7, in contrast to animals expressing A $\beta$  that exhibit significant neurodegeneration at days 3 ( $P<0.0001$ ) or 7 ( $P<0.0001$ ). Co-expression of A $\beta$  and *ApoE2* {UA351(*baln50[P<sub>eat-4</sub>::APOE2, P<sub>unc-54</sub>::tdTomato]*); *baln34[P<sub>eat-4</sub>::A $\beta$ ,P<sub>myo-2</sub>::mCherry]*}; *adls1240[P<sub>eat-4</sub>::GFP]*} significantly attenuated neurodegeneration at days 3 ( $P=0.0397$ ) and 7 ( $P=0.0002$ ) post-hatching, whereas co-expression of *APOE3* {UA353(*baln51[P<sub>eat-4</sub>::ApoE3, P<sub>unc-54</sub>::tdTomato]*); *baln34[P<sub>eat-4</sub>::A $\beta$ , P<sub>myo-2</sub>::mCherry]*}; *adls1240[P<sub>eat-4</sub>::GFP]*} resulted in no significant difference from A $\beta$  alone at day 3 ( $P=0.02945$ ). However, by day 7 post-hatching, co-expression of *ApoE3* yielded a significant reduction in A $\beta$ -mediated neurodegeneration ( $P=0.0102$ ). In contrast, co-expression of *APOE4* {UA355(*baln52[P<sub>eat-4</sub>::APOE4, P<sub>unc-54</sub>::tdTomato]*); *baln34[P<sub>eat-4</sub>::A $\beta$ ,P<sub>myo-2</sub>::mCherry]*}; *adls1240[P<sub>eat-4</sub>::GFP]*} resulted in no significant difference from A $\beta$  alone at days 3 ( $P=0.9579$ ) or 7 ( $P=0.9369$ ) post-hatching. At day 3, there was no significant difference between A $\beta$ +*APOE2* and A $\beta$ +*APOE3* ( $P=0.5048$ ), A $\beta$ +*ApoE3* and A $\beta$ +*APOE4* ( $P=0.5225$ ), or A $\beta$ +*APOE2* and A $\beta$ +*ApoE4* ( $P=0.0797$ ). However, at day 7 post-hatching, protection by *APOE2* was significantly higher than that by *APOE3* ( $P=0.028$ ) and *APOE4* ( $P=0.0001$ ). Additionally, at day 7 post-hatching, protection by *APOE3* was significantly higher than that by *APOE4* ( $P=0.0049$ ).  $n=90$  for each strain; one-way ANOVA with Tukey's post hoc test. These data are reported as mean normalized to GFP animals $\pm$ s.e.m. All nematodes were grown at 20°C.

(C) Representative images of *C. elegans* glutamatergic tail neurons containing GFP (DA1240), A $\beta$  alone (UA198), A $\beta$ +*APOE2* (UA351), A $\beta$ +*APOE3* (UA353) and A $\beta$ +*ApoE4* (UA355). Arrows point to intact neurons, whereas arrowheads indicate sites of neurons that have degenerated. Scale bar: 10  $\mu$ m.

(D) Expression of A $\beta$  (UA198) hampers mechanosensation ( $P<0.0001$ ), but expression of the *APOE* alleles (UA356, UA357, UA358) alone, without A $\beta$  co-expression, does not affect mechanosensory response ( $P>0.9999$ ,  $P=0.9971$ ,  $P>0.9999$ , respectively). Additionally, expression of the *APOE* alleles alone showed no statistically significant difference between *APOE2* and *APOE3* ( $P=0.9914$ ), *APOE2* and *APOE4* ( $P=0.9994$ ), or *APOE3* and *APOE4* ( $P=0.9994$ ). The difference between A $\beta$ -expressing animals and any of the *APOE* alleles alone was statistically significant ( $P<0.0001$  in each comparison).  $n=90$  for each strain; one-way ANOVA with Tukey's post hoc test. These data are reported as mean $\pm$ s.e.m.

(E) Glutamatergic expression of A $\beta$  hampers the gentle touch response ( $P<0.0001$ ). A $\beta$ +*APOE2* mitigates loss of mechanosensation ( $P=0.0095$ ), but there was no significant difference between A $\beta$  and either *APOE3* ( $P=0.747$ ) or *APOE4* ( $P=0.644$ ). Additionally, there was no significant difference between A $\beta$ +*APOE2* and A $\beta$ +*APOE3* ( $P=0.1429$ ), A $\beta$ +*APOE2* and A $\beta$ +*APOE4* ( $P=0.1875$ ), or A $\beta$ +*APOE3* and A $\beta$ +*APOE4* ( $P=0.9997$ ).  $n=90$  for each strain; one-way ANOVA with Tukey's post hoc test. These data are reported as mean $\pm$ s.e.m.

(F) Expression of *APOE* was determined by RT-qPCR of mRNA isolated from 100 animals for each of *APOE2*, *APOE3* and *APOE4*. Amplification and Cq quantification by quantitative PCR shows twofold higher expression of *APOE4* than *APOE2* that is not statistically significant ( $P=0.2107$ ). The fourfold higher expression of *APOE3* than *APOE2* was statistically significant ( $P=0.0127$ ), but the difference between *APOE3* and *APOE4* was not statistically significant ( $P=0.1280$ ). Values represent the mean $\pm$ s.e.m. of three independent biological replicates each with three technical replicates; one-way ANOVA with Tukey's post hoc test. \* denotes statistical significance; ns, nonsignificant.

et al., 1999). In cultured mouse cortical neurons, the opposite effect is observed, wherein NMDA-mediated calcium influx is inhibited by ApoE4 but exacerbated by ApoE2 and ApoE3 (Chen et al., 2010). Nevertheless, in both mammalian scenarios the functional impact of A $\beta$  neurotoxicity was not assessed. To test the relationship between calcium, ApoE and A $\beta$  in our model, we utilized thapsigargin, which increases cytosolic calcium concentrations by inhibiting the endoplasmic reticulum (ER) Ca<sup>2+</sup>-ATPase *sca-1*. Indeed, calcium influx induced by *APOE* has been partially attributed to ER calcium stores (Tolar et al., 1999). Animals expressing GFP alone were not impacted by thapsigargin treatment (Fig. 2A). Thapsigargin treatment of animals expressing A $\beta$  attenuated neurodegeneration by nearly 20% compared with vehicle control at days 3 and 7 (Fig. 2A). There was no additive reduction in neurodegeneration by thapsigargin treatment with expression of either *APOE2* or *APOE3* at either day 3 or 7, suggesting that ApoE may potentially alloy neurodegeneration in the same pathway as ER-derived calcium. As previously observed, the effect of ApoE4 was significantly reduced when compared with ApoE2 at both days 3 ( $P<0.0001$ ) and 7 ( $P=0.0177$ ), but together with thapsigargin, ApoE4 showed protection similar to A $\beta$ +ApoE2 at both time points. No effect was observed from treatment of GFP animals expressing *APOE* without A $\beta$  (Fig. 2B). These data suggest that ApoE2 is neuroprotective through an interaction with ER-derived calcium and that this interaction is lost with the ApoE4 protein variant.

To confirm that the observed effect by thapsigargin is related to its inhibition of *sca-1*, a Ca<sup>2+</sup> ATPase and target of thapsigargin, we generated a conditional RNAi-sensitive strain, in which RNAi is restricted to the glutamatergic neurons. This strain was then crossed into the A $\beta$  and A $\beta$ +ApoE backgrounds, so that genetic targets can be depleted with co-expression of A $\beta$  and ApoE (Table 1). As previously observed, thapsigargin treatment reduced neurodegeneration in animals expressing A $\beta$  alone and co-expressing A $\beta$ +ApoE4, but not in either A $\beta$ +ApoE2 or A $\beta$ +ApoE3 animals (Fig. 3). Depletion of *sca-1* in A $\beta$  alone was neuroprotective when compared with empty vector (EV) control, but there was no additional protection conferred by a combination of *sca-1* RNAi and thapsigargin treatment, suggesting that protection by thapsigargin, redundant with ApoE2 and ApoE3, is not independent from its target, *sca-1*. In contrast, *sca-1* RNAi was protective in the backgrounds expressing A $\beta$  alone and A $\beta$ +*APOE4*. Taken together, these data suggest that there is a genetic relationship between *APOE2* and *sca-1* that is lost in the *APOE4* genetic background.

Thapsigargin-induced alterations in ER-derived Ca<sup>2+</sup> dynamics have been reported to also increase autophagy (Høyer-Hansen et al., 2007). Conversely, thapsigargin has also been observed to block degradation of autophagosomes without altering basal autophagy or maturation of autophagosomes (Ganley et al., 2011). To examine the relationship between thapsigargin, autophagy, A $\beta$  and ApoE, neurodegeneration was examined in the conditional RNAi-sensitive strains with depletion of *atg-7*, which is required for the initiation of autophagy. Depletion of *atg-7* increased neurodegeneration in animals expressing A $\beta$  alone (Fig. 3), but the difference was no longer statistically significant by day 7 (Fig. 3). With *atg-7* RNAi, thapsigargin treatment was significantly protective (Fig. 3) until day 7 (Fig. 3). Depletion of *atg-7* also increased neurodegeneration in both A $\beta$ +ApoE2 and A $\beta$ +ApoE3 backgrounds, but with significantly less degeneration than A $\beta$  alone with *atg-7* RNAi, suggesting that protection by ApoE2 and ApoE3 is independent of autophagy. There was also no additional protection afforded by thapsigargin in the A $\beta$ +ApoE2 or A $\beta$ +ApoE3 backgrounds with

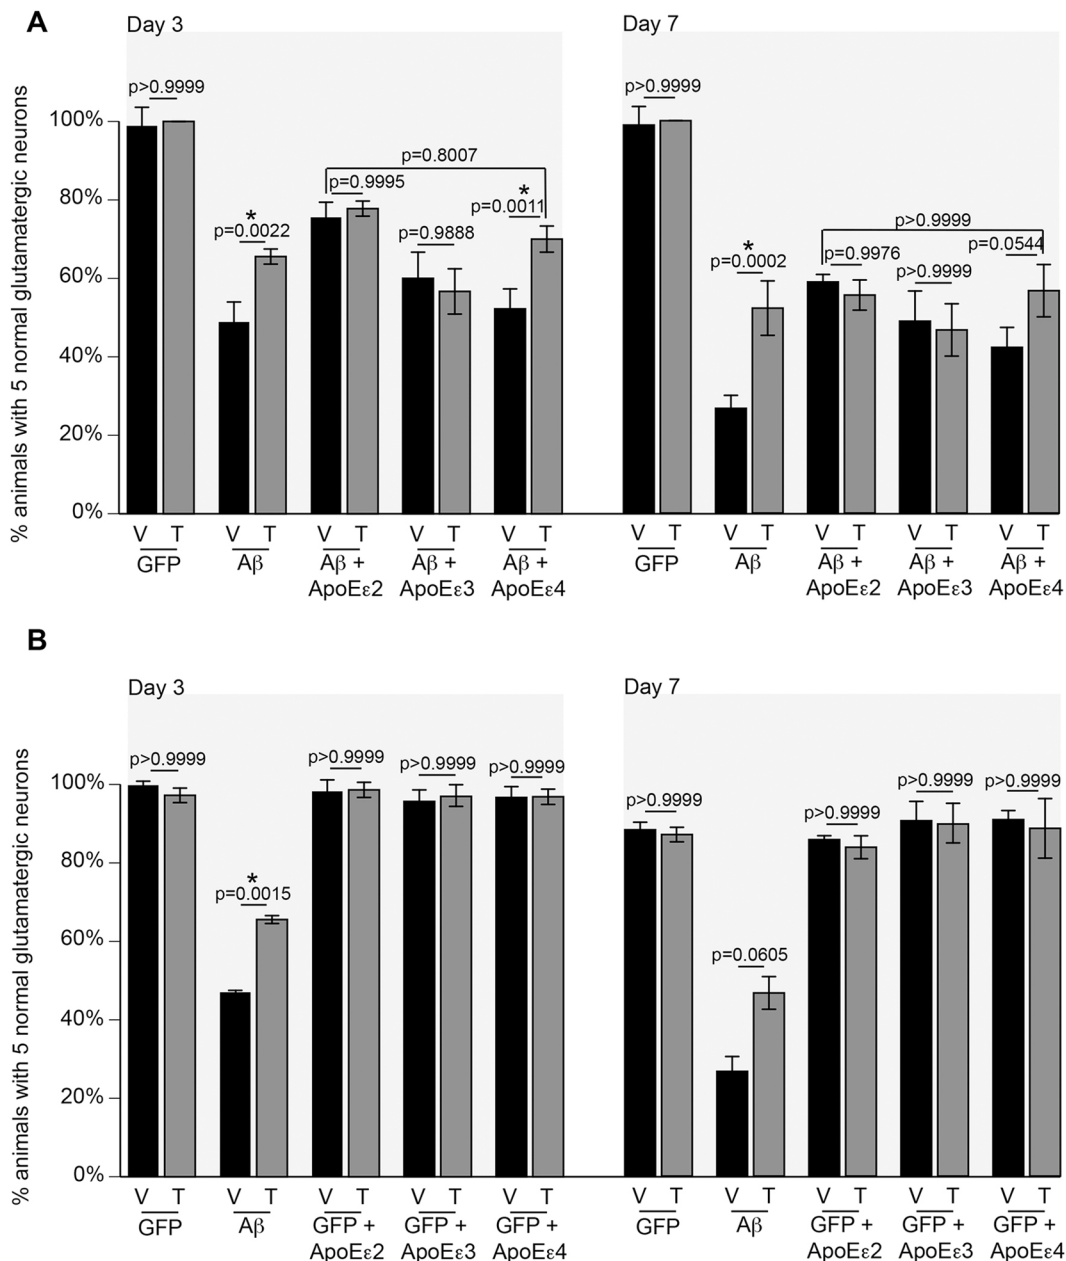

**Fig. 2. Thapsigargin treatment reduces neurodegeneration with A $\beta$  and A $\beta$ +ApoE $\epsilon$ 4, but has no additive neuroprotective effect with either ApoE $\epsilon$ 2 or ApoE $\epsilon$ 3.** (A) At day 3 post-hatching, thapsigargin (T) has no effect on synchronized hermaphrodite populations expressing GFP alone in the glutamatergic neurons (DA1240;  $P>0.9999$ ), but it attenuates neurodegeneration with A $\beta$  compared with vehicle (V) control (UA198;  $P<0.0022$ ). There was no observable difference between vehicle and thapsigargin treatments in A $\beta$ +ApoE $\epsilon$ 2 (UA351;  $P=0.9995$ ) or A $\beta$ +ApoE $\epsilon$ 3 (UA353;  $P=0.9888$ ). However, thapsigargin treatment reduced neurodegeneration in A $\beta$ +ApoE $\epsilon$ 4 compared with vehicle (UA355;  $P=0.0011$ ). This rescue was statistically insignificant when comparing A $\beta$ +ApoE $\epsilon$ 2 with vehicle ( $P=0.8007$ ). Similarly, at day 7 post-hatching, there was no difference between vehicle and thapsigargin treatments in animals expressing GFP alone (DA1240;  $P>0.9999$ ), while thapsigargin reduced A $\beta$ -mediated neurodegeneration (UA198;  $P<0.0002$ ). Thapsigargin treatment had no effect on neurodegeneration in A $\beta$ +ApoE $\epsilon$ 2 (UA351;  $P=0.9976$ ) or A $\beta$ +ApoE $\epsilon$ 3 (UA353;  $P>0.9999$ ), and failed to attenuate neurodegeneration significantly with ApoE $\epsilon$ 4 co-expression (UA355;  $P=0.0544$ ). When treated with thapsigargin, A $\beta$ +ApoE $\epsilon$ 4 was not different from A $\beta$ +ApoE $\epsilon$ 2 with vehicle ( $P>0.9999$ ).  $n=90$  for each strain; two-way ANOVA with Tukey's post hoc test. These data are reported as mean animals $\pm$ s.d. All nematodes were grown at 20°C. (B) At days 3 and 7 post-hatching, thapsigargin had no effect on synchronized hermaphrodite populations expressing GFP alone in the glutamatergic neurons (DA1240; day 3,  $P>0.9999$ ; day 7,  $P>0.9999$ ), but thapsigargin (T) attenuates neurodegeneration with A $\beta$  compared with vehicle (V) control (UA198; day 3,  $P<0.0015$ ). The effect of thapsigargin on UA198 at day 7 was not statistically significant ( $P=0.0605$ ). Without A $\beta$  expression, thapsigargin has no statistically significant effect on neurodegeneration in ApoE $\epsilon$ 2 (UA356; day 3,  $P>0.9999$ ; day 7,  $P>0.9999$ ), ApoE $\epsilon$ 3 (UA357; day 3,  $P>0.9999$ ; day 7,  $P>0.9999$ ) or ApoE $\epsilon$ 4 animals (UA358; day 3,  $P>0.9999$ ; day 7,  $P>0.9999$ ). These data are reported as mean animals $\pm$ s.d.  $n=90$  for each strain; two-way ANOVA with Sidak's post hoc test. All nematodes were grown at 20°C. \* denotes statistical significance.

*atg-7* RNAi, further indicating that ApoE $\epsilon$ 2 and ApoE $\epsilon$ 3 participate with calcium homeostasis to mediate protection. In contrast, *atg-7* RNAi increased neurodegeneration in the A $\beta$ +ApoE $\epsilon$ 4 background,

but was attenuated with thapsigargin treatment, further revealing the dysfunctional relationship between ApoE $\epsilon$ 4 and calcium homeostasis.

**Table 1. Summary of all the strains utilized in this study**

| Strain                                | Genotype                                                                                                                                                                                                                                                                                                                                  |
|---------------------------------------|-------------------------------------------------------------------------------------------------------------------------------------------------------------------------------------------------------------------------------------------------------------------------------------------------------------------------------------------|
| <b>N2 (Bristol) background</b>        |                                                                                                                                                                                                                                                                                                                                           |
| UA350                                 | <i>baln50</i> [ <i>P<sub>eat-4</sub>::APOEε2</i> , <i>P<sub>unc-54</sub>::tdTomato</i> ]                                                                                                                                                                                                                                                  |
| UA352                                 | <i>baln51</i> [ <i>P<sub>eat-4</sub>::APOEε3</i> , <i>P<sub>unc-54</sub>::tdTomato</i> ]                                                                                                                                                                                                                                                  |
| UA354                                 | <i>baln52</i> [ <i>P<sub>eat-4</sub>::APOEε4</i> , <i>P<sub>unc-54</sub>::tdTomato</i> ]                                                                                                                                                                                                                                                  |
| <b>GFP and ApoE expression</b>        |                                                                                                                                                                                                                                                                                                                                           |
| DA1240                                | <i>adls1240</i> [ <i>P<sub>eat-4</sub>::GFP+lin-15(+)</i> ]                                                                                                                                                                                                                                                                               |
| UA356                                 | <i>adls1240</i> [ <i>P<sub>eat-4</sub>::GFP+lin-15(+)</i> ]; <i>baln50</i> [ <i>P<sub>eat-4</sub>::APOEε2</i> , <i>P<sub>unc-54</sub>::tdTomato</i> ]                                                                                                                                                                                     |
| UA357                                 | <i>adls1240</i> [ <i>P<sub>eat-4</sub>::GFP+lin-15(+)</i> ]; <i>baln51</i> [ <i>P<sub>eat-4</sub>::APOEε3</i> , <i>P<sub>unc-54</sub>::tdTomato</i> ]                                                                                                                                                                                     |
| UA358                                 | <i>adls1240</i> [ <i>P<sub>eat-4</sub>::GFP+lin-15(+)</i> ]; <i>baln52</i> [ <i>P<sub>eat-4</sub>::APOEε4</i> , <i>P<sub>unc-54</sub>::tdTomato</i> ]                                                                                                                                                                                     |
| <b>GFP, ApoE and Aβ co-expression</b> |                                                                                                                                                                                                                                                                                                                                           |
| UA198                                 | <i>baln34</i> [ <i>P<sub>eat-4</sub>::Aβ</i> , <i>P<sub>myo-2</sub>::mCherry</i> ]; <i>adls1240</i> [ <i>P<sub>eat-4</sub>::GFP</i> ]                                                                                                                                                                                                     |
| UA351                                 | <i>baln50</i> [ <i>P<sub>eat-4</sub>::APOEε2</i> , <i>P<sub>unc-54</sub>::tdTomato</i> ]; <i>baln34</i> [ <i>P<sub>eat-4</sub>::Aβ</i> , <i>P<sub>myo-2</sub>::mCherry</i> ]; <i>adls1240</i> [ <i>P<sub>eat-4</sub>::GFP</i> ]                                                                                                           |
| UA353                                 | <i>baln51</i> [ <i>P<sub>eat-4</sub>::APOEε3</i> , <i>P<sub>unc-54</sub>::tdTomato</i> ]; <i>baln34</i> [ <i>P<sub>eat-4</sub>::Aβ</i> , <i>P<sub>myo-2</sub>::mCherry</i> ]; <i>adls1240</i> [ <i>P<sub>eat-4</sub>::GFP</i> ]                                                                                                           |
| UA355                                 | <i>baln52</i> [ <i>P<sub>eat-4</sub>::APOEε4</i> , <i>P<sub>unc-54</sub>::tdTomato</i> ]; <i>baln34</i> [ <i>P<sub>eat-4</sub>::Aβ</i> , <i>P<sub>myo-2</sub>::mCherry</i> ]; <i>adls1240</i> [ <i>P<sub>eat-4</sub>::GFP</i> ]                                                                                                           |
| <b>Conditional RNAi strains</b>       |                                                                                                                                                                                                                                                                                                                                           |
| UA311                                 | <i>baln53</i> [ <i>P<sub>eat-4</sub>::sid-1</i> , <i>P<sub>dat-1</sub>::GFP</i> ]                                                                                                                                                                                                                                                         |
| UA359                                 | <i>sid-1(pk3321)</i> ; <i>baln53</i> [ <i>P<sub>eat-4</sub>::sid-1</i> , <i>P<sub>dat-1</sub>::GFP</i> ]; <i>adls1240</i> [ <i>P<sub>eat-4</sub>::GFP</i> ]                                                                                                                                                                               |
| UA360                                 | <i>sid-1(pk3321)</i> ; <i>baln53</i> [ <i>P<sub>eat-4</sub>::sid-1</i> , <i>P<sub>dat-1</sub>::GFP</i> ]; <i>adls1240</i> [ <i>P<sub>eat-4</sub>::GFP</i> ]; <i>baln34</i> [ <i>P<sub>eat-4</sub>::Aβ</i> , <i>P<sub>myo-2</sub>::mCherry</i> ]                                                                                           |
| UA364                                 | <i>sid-1(pk3321)</i> ; <i>baln53</i> [ <i>P<sub>eat-4</sub>::sid-1</i> , <i>P<sub>dat-1</sub>::GFP</i> ]; <i>baln50</i> [ <i>P<sub>eat-4</sub>::APOEε2</i> , <i>P<sub>unc-54</sub>::tdTomato</i> ]; <i>adls1240</i> [ <i>P<sub>eat-4</sub>::GFP</i> ]; <i>baln34</i> [ <i>P<sub>eat-4</sub>::Aβ</i> , <i>P<sub>myo-2</sub>::mCherry</i> ] |
| UA365                                 | <i>sid-1(pk3321)</i> ; <i>baln53</i> [ <i>P<sub>eat-4</sub>::sid-1</i> , <i>P<sub>dat-1</sub>::GFP</i> ]; <i>baln51</i> [ <i>P<sub>eat-4</sub>::APOEε3</i> , <i>P<sub>unc-54</sub>::tdTomato</i> ]; <i>adls1240</i> [ <i>P<sub>eat-4</sub>::GFP</i> ]; <i>baln34</i> [ <i>P<sub>eat-4</sub>::Aβ</i> , <i>P<sub>myo-2</sub>::mCherry</i> ] |
| UA366                                 | <i>sid-1(pk3321)</i> ; <i>baln53</i> [ <i>P<sub>eat-4</sub>::sid-1</i> , <i>P<sub>dat-1</sub>::GFP</i> ]; <i>baln52</i> [ <i>P<sub>eat-4</sub>::APOEε4</i> , <i>P<sub>unc-54</sub>::tdTomato</i> ]; <i>adls1240</i> [ <i>P<sub>eat-4</sub>::GFP</i> ]; <i>baln34</i> [ <i>P<sub>eat-4</sub>::Aβ</i> , <i>P<sub>myo-2</sub>::mCherry</i> ] |

### Attenuation of neurodegeneration by starvation is independent of ApoE function

Starvation and caloric restriction increase health and lifespan through multiple pathways that overlap with significant conservation among yeast, *C. elegans*, *Drosophila*, rodents and primates (Fontana et al., 2010). Furthermore, dietary restriction reduces Aβ toxicity (Steinkraus et al., 2008). We therefore hypothesized that starvation would attenuate Aβ-mediated neurodegeneration and tested its effect in the context of the three distinct *APOE* alleles. To test this, synchronized embryos were hatched onto unseeded plates and incubated for 24 h, after which time they were transferred to normal (nematode growth medium; NGM) nematode plates seeded with *Escherichia coli*. Although early-L1-stage larval starvation attenuated neurodegeneration as expected in worms expressing Aβ alone, this protective effect was also shared indiscriminately with animals co-expressing any of the *APOE* alleles (Fig. 4A). These data suggest that, in modulating its effects on neuron survival, ApoE operates outside of this starvation-induced rescue response, thus excluding this mechanism of dietary restriction as an *APOE*-allele-specific means of modulating neurotoxicity. However, alternative dietary restriction regimens in *C. elegans* have been found to extend lifespan through parallel or overlapping pathways (Greer and Brunet, 2009). The extension of lifespan by dietary deprivation was dependent on heat shock factor 1 (*hsf-1*), while AMP-activated protein kinase 2 (*aak-2*) and FOXO/*daf-16* were required for lifespan extension by the absence of peptone. Because the dietary deprivation regimen begins dietary restriction at day 2 of adulthood (day 5 post-

hatching), animals were washed off food at day 5 post-hatching and moved to unseeded plates until analysis at day 7. Although dietary deprivation reduced neurodegeneration in the background expressing Aβ alone (Fig. 4B), dietary deprivation provided no statistically significant rescue in the Aβ+ApoEε2, Aβ+ApoEε3 or Aβ+ApoEε4 backgrounds, suggesting that the ApoE protein, irrespective of allelic variation, might generally interfere with *hsf-1*-associated protective mechanisms. In contrast, there was no statistically significant change in neurodegeneration in animals subjected to the absence of peptone regimen at either days 3 or 7 (Fig. 4C).

### Survival shortened by Aβ is rescued by ApoEε2 and ApoEε3, but not ApoEε4

Because AD is an age-related disease and *APOEε4* homozygosity is associated with earlier onset of AD (Bu, 2009; Corder et al., 1993; Liu et al., 2013a), we examined how the relationship between Aβ and ApoE in the glutamatergic neurons affected survival with aging. Additionally, the Mantel–Cox/log-rank method was used for survival analyses, as it assigns equal weights in statistical calculations for the entire pattern or path of the curve, not just the median or maximum values displayed. Both wild type (Bristol N2) and animals expressing GFP alone exhibited similar survival curves that were not significantly different from each other (Fig. 5A). In animals expressing Aβ, survival was significantly reduced (Fig. 5A), suggesting a relationship between glutamatergic neurodegeneration and aging in the *C. elegans* neuronal model. In animals expressing *APOE* alleles alone (encoding ApoEε2, ApoEε3 or ApoEε4), the survival curves were similar to the N2 control (Fig. 5B–D). However, co-expression of Aβ+ApoEε2 or Aβ+ApoEε3 increased survival (Fig. 5E,F), compared with Aβ alone (Fig. 5A). In contrast, co-expression of Aβ+ApoEε4 had no significant effect compared with Aβ alone (Fig. 5G). These data suggest that integrity of the glutamatergic neurons through the aging process, as differentially modulated by the *APOE* alleles in the presence of Aβ, affects whole-animal survival.

### DISCUSSION

The *APOEε4* allele is the strongest risk factor associated with late-onset AD, yet determining precisely how the *APOE* alleles differentially modulate Aβ toxicity and neuronal behavior remains unresolved. An expedient examination of the relationship between the *APOE* alleles and Aβ requires a model system in which neuronal dysfunction and loss are amenable to both genetics and tractable neuronal outputs. Our *C. elegans* model of Aβ-induced neurodegeneration in glutamatergic neurons recapitulates mammalian and cell culture models for AD-associated gene analyses (Griffin et al., 2017; Matlack et al., 2014; Treusch et al., 2011). Furthermore, genes associated with AD have *C. elegans* orthologs (Mukherjee et al., 2017; Vahdati Nia et al., 2017). Here, we debut a model of ApoE activity in our established neuronal *C. elegans* background and suggest that it can be exploited to examine the relationship between ApoE and Aβ for neuronal behavior, integrity and proteotoxicity.

Mammalian and cell culture models show that the *APOEε2* allele provides a protective effect against Aβ-mediated neurodegeneration, while the most prevalent allele, *APOEε3*, provides none (Bu, 2009; Corder et al., 1993; Huang and Mucke, 2012; Liu et al., 2013a). *APOEε4* is associated with enhanced susceptibility and earlier onset of AD, as well as exacerbated neurodegeneration. Studies have shown that the *APOEε2* allele may be neuroprotective through a mechanism that consists of more than simply the absence of the *APOEε4* allele (Corder et al., 1994; Talbot et al., 1994). It is noteworthy that in

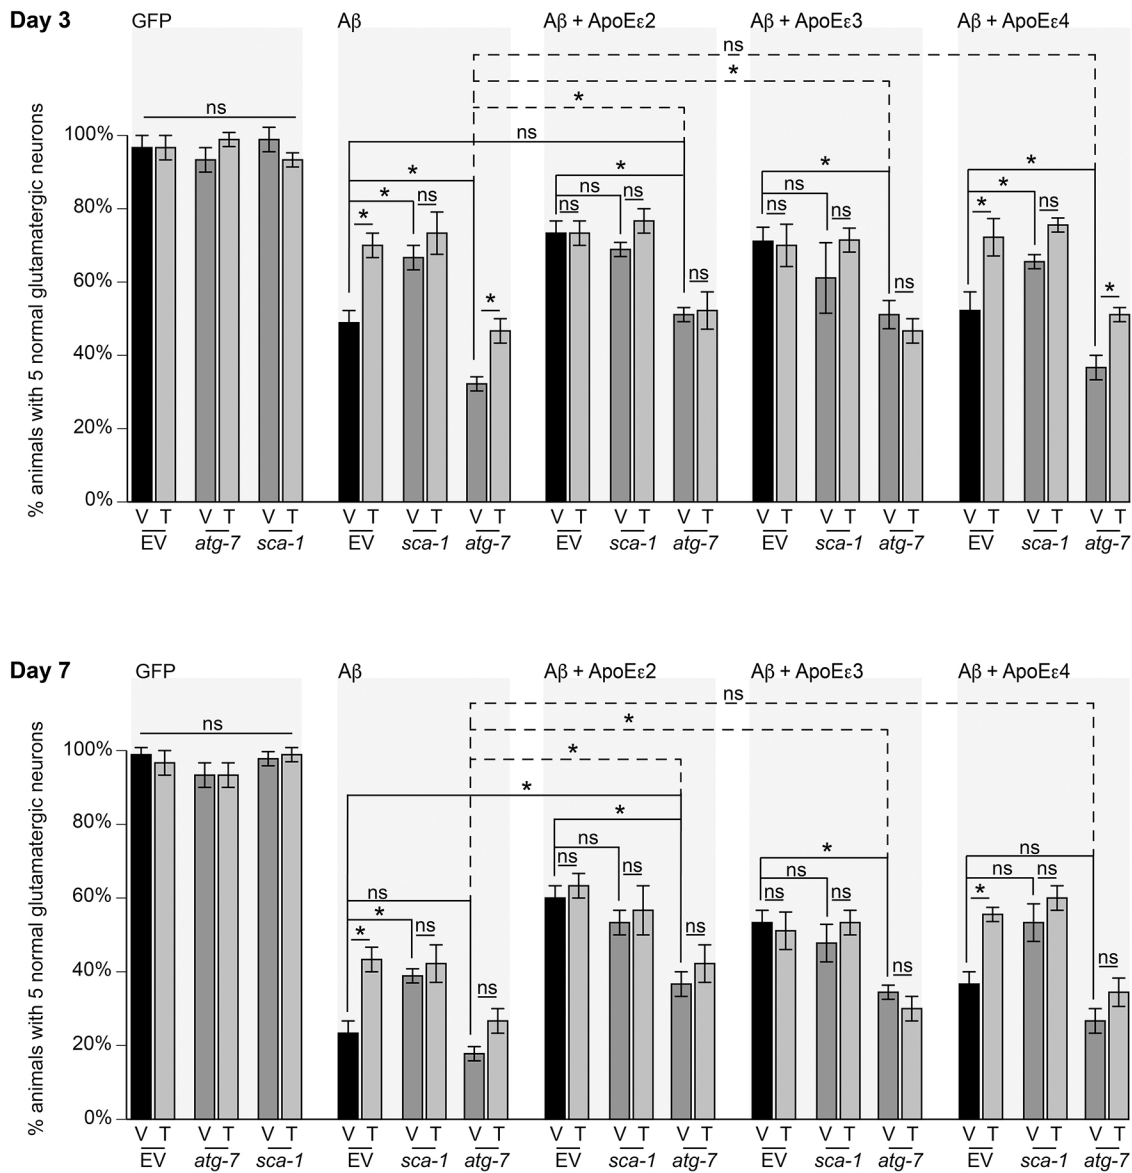

Fig. 3. See next page for legend.

several of our assays, we identified contrasting phenotypes from *C. elegans* with either Aβ+ApoEε2 or Aβ+ApoEε4. As an illustration, overexpression of human ApoEε2 in *C. elegans* vitiates Aβ-mediated neurodegeneration, whereas ApoEε3 only appears to have a rescuing phenotype later in life (Fig. 1B). However, the neuroprotective effect observed was not recapitulated by the ApoEε4 variant (Fig. 1B). These data, which are functionally reflective of the well-established clinical susceptibility profile associated with ApoE, highlight the conservation of the neurodegenerative consequences that arise with the allelic distribution associated with AD. While loss of neuroprotective function in the Aβ+ApoEε4 background represents a mechanistically relevant observation, additional avenues of ApoEε4-associated alterations in cell biology remain to be explored. For example, although the ε4 allele is typically associated with increased Aβ toxicity and disruption of homeostatic pathways *per se*, we observe no increase in neurodegeneration by the *APOEε4* allele. This may be due to a C-terminal proteolytic product of *APOEε4* that more strongly induces cellular responses associated with neurodegeneration (Bien-Ly et al., 2011; Brecht et al., 2004;

Harris et al., 2003; Tolar et al., 1999). However, the effectors of this cleavage are unknown. Yet, full-length ApoEε4 has been observed to alter expression of sirtuin, which could affect observable phenotypes under additional stress (Lattanzio et al., 2014; Theendakara et al., 2013, 2016). Thus, *C. elegans* might be an effective model for examining how full-length ApoEε4 and its truncate modify Aβ toxicity *in vivo*.

Calcium homeostasis is found to be perturbed in AD, particularly by ApoE through glutamatergic (NMDA) receptor function (Chen et al., 2010; Hartmann et al., 1994; Qiu et al., 2003; Tolar et al., 1999). Thapsigargin treatment increases cytosolic calcium levels by inhibiting calcium uptake into the ER and we find that it mitigates Aβ toxicity, but not in the presence of either ApoEε2 or ApoEε3 (Fig. 2A), suggesting that ApoE has a function within calcium homeostasis that is selectively lost by the *APOEε4* allele. Whether this is dependent on glutamatergic receptors in our model is not yet clear. However, it appears that ER-derived calcium also contributes to ApoEε4-associated calcium defects (Tolar et al., 1999). Notably, autophagy has also been shown to be impaired in AD. Although it

**Fig. 3. Protection by thapsigargin is redundant with *sca-1*, but independent of *atg-7* in ApoE $\epsilon$ 2 and ApoE $\epsilon$ 3, but not ApoE $\epsilon$ 4, backgrounds.** To examine how thapsigargin impacts neurodegeneration we utilized a neuronal RNAi-sensitive strain crossed into the A $\beta$ +ApoE backgrounds, in which we knocked down the ER Ca<sup>2+</sup> ATPase homolog *sca-1*, or *atg-7*, required for the initiation of autophagy. These strains are designated as the following: A $\beta$  glutamatergic-specific RNAi (no ApoE) {UA360(*sid-1(pk3321)*); *baln53*[P<sub>eat-4</sub>::*sid-1*, P<sub>dat-1</sub>::GFP]; *adls1240*[P<sub>eat-4</sub>::GFP]; *baln34*[P<sub>eat-4</sub>::A $\beta$ , P<sub>myo-2</sub>::mCherry]); A $\beta$ +ApoE $\epsilon$ 2 glutamatergic-specific RNAi {UA364(*sid-1(pk3321)*); *baln53*[P<sub>eat-4</sub>::*sid-1*, P<sub>dat-1</sub>::GFP]; *adls1240*[P<sub>eat-4</sub>::GFP]; *baln50*[P<sub>eat-4</sub>::ApoE $\epsilon$ 2, P<sub>unc-54</sub>::tdTomato]; *baln34*[P<sub>eat-4</sub>::A $\beta$ , P<sub>myo-2</sub>::mCherry]); A $\beta$ +ApoE $\epsilon$ 3 glutamatergic-specific RNAi {UA365(*sid-1(pk3321)*); *baln53*[P<sub>eat-4</sub>::*sid-1*, P<sub>dat-1</sub>::GFP]; *adls1240*[P<sub>eat-4</sub>::GFP]; *baln51*[P<sub>eat-4</sub>::ApoE $\epsilon$ 3, P<sub>unc-54</sub>::tdTomato]; *baln34*[P<sub>eat-4</sub>::A $\beta$ , P<sub>myo-2</sub>::mCherry]); and A $\beta$ +ApoE $\epsilon$ 4 glutamatergic-specific RNAi {UA366(*sid-1(pk3321)*); *baln53*[P<sub>eat-4</sub>::*sid-1*, P<sub>dat-1</sub>::GFP]; *adls1240*[P<sub>eat-4</sub>::GFP]; *baln52*[P<sub>eat-4</sub>::ApoE $\epsilon$ 4, P<sub>unc-54</sub>::tdTomato]; *baln34*[P<sub>eat-4</sub>::A $\beta$ , P<sub>myo-2</sub>::mCherry]}. At days 3 and 7 post-hatching, neither *atg-7* nor *sca-1* RNAi depletion had an effect on animals expressing GFP alone (UA359;  $P > 0.9999$  for each). Thapsigargin treatment (T) did not affect the phenotypes in the GFP background (UA359;  $P > 0.9999$  for each), but reduced A $\beta$ -mediated neurodegeneration significantly at days 3 (UA360;  $P < 0.0001$ ) and 7 post-hatching ( $P < 0.0001$ ). Depletion of *sca-1* significantly reduced neurodegeneration at both days 3 ( $P = 0.0002$ ) and 7 ( $P = 0.0009$ ), but there was no statistically significant change when *sca-1*-depleted animals were treated with thapsigargin at either day 3 ( $P > 0.9999$ ) or 7 ( $P > 0.9999$ ). Although *atg-7* RNAi increased neurodegeneration in the A $\beta$  background at day 3 ( $P = 0.0007$ ), the difference between empty vector (EV) and *atg-7* (RNAi) was not statistically significant at day 7 ( $P > 0.9999$ ). Similarly, thapsigargin was significantly protective with *atg-7* depletion at day 3 ( $P = 0.0097$ ), but not at day 7 ( $P = 0.9111$ ). As previously observed, thapsigargin treatment provided no additional protection with A $\beta$ +ApoE $\epsilon$ 2 co-expression (day 3,  $P > 0.9999$ ; day 7,  $P > 0.9999$ ). There was no statistically significant difference in neurodegeneration between A $\beta$ +ApoE $\epsilon$ 2 EV and *sca-1* RNAi (UA364; day 3,  $P > 0.9999$ ; day 7,  $P > 0.9999$ ) and no additional benefit of thapsigargin treatment with *sca-1* RNAi in the A $\beta$ +ApoE $\epsilon$ 2 background (day 3,  $P = 0.9992$ ; day 7,  $P > 0.9999$ ). Depletion of *atg-7* in the A $\beta$ +ApoE $\epsilon$ 2 background increased neurodegeneration at both days 3 ( $P < 0.0001$ ) and 7 ( $P < 0.0001$ ), but ApoE $\epsilon$ 2 still provided rescue with *atg-7* depletion when compared with A $\beta$  alone with *atg-7* RNAi (day 3,  $P < 0.0001$ ; day 7,  $P = 0.0007$ ). Similar effects were observed in the A $\beta$ +ApoE $\epsilon$ 3 background, including no additional protection with thapsigargin treatment compared with vehicle (V) (UA365; day 3,  $P > 0.9999$ ; day 7,  $P > 0.9999$ ), depletion of *sca-1* providing no additional protection with A $\beta$ +ApoE $\epsilon$ 3 co-expression (day 3,  $P = 0.9368$ ; day 7,  $P > 0.9999$ ), and no additive protection with thapsigargin treatment and *sca-1* RNAi (day 3,  $P = 0.5193$ ; day 7,  $P > 0.9999$ ). Similarly, *atg-7* RNAi significantly increased neurodegeneration compared with EV control (day 3,  $P < 0.0001$ ; day 7,  $P < 0.0001$ ), but it was still statistically significantly neuroprotective compared with A $\beta$  alone with *atg-7* RNAi (day 3,  $P < 0.0001$ ; day 7,  $P = 0.0002$ ). Thapsigargin treatment did not reduce neurodegeneration with *atg-7* RNAi in the A $\beta$ +ApoE $\epsilon$ 3 background (day 3,  $P > 0.9999$ ; day 7,  $P > 0.9999$ ). In contrast, as previously observed, thapsigargin was protective in the A $\beta$ +ApoE $\epsilon$ 4 background at both days 3 (UA366;  $P < 0.0001$ ) and 7 ( $P < 0.0001$ ). Although *sca-1* RNAi conferred no additional protection with co-expression of A $\beta$ +ApoE $\epsilon$ 2 or A $\beta$ +ApoE $\epsilon$ 3, *sca-1* RNAi reduced neurodegeneration in the A $\beta$ +ApoE $\epsilon$ 4 background (day 3,  $P = 0.0330$ ; day 7,  $P = 0.0330$ ). Again, thapsigargin treatment did not decrease neurodegeneration in the A $\beta$ +ApoE $\epsilon$ 4 background with *sca-1* RNAi (day 3,  $P = 0.6339$ ; day 7,  $P > 0.9999$ ). Depletion of *atg-7* significantly increased neurodegeneration in the A $\beta$ +ApoE $\epsilon$ 4 background at day 3 ( $P = 0.0027$ ), but it did not significantly increase neurodegeneration at day 7 ( $P = 0.4216$ ). Expression of ApoE $\epsilon$ 4 conferred no significant protection against A $\beta$ -mediated neurodegeneration with *atg-7* RNAi when compared with A $\beta$  alone (day 3,  $P > 0.9999$ ; day 7,  $P = 0.8111$ ). In contrast to the A $\beta$ +ApoE $\epsilon$ 2 or A $\beta$ +ApoE $\epsilon$ 3 backgrounds, thapsigargin provided significant protection with depletion of *atg-7* in the A $\beta$ +ApoE $\epsilon$ 4 background at day 3 ( $P = 0.0097$ ), but there was no statistically significant difference induced by thapsigargin with *atg-7* RNAi at day 7 ( $P = 0.9909$ ).  $n = 90$  for each line; \* indicates statistical significance; ns, not significant; two-way ANOVA with Tukey's post hoc test. These data are reported as mean  $\pm$  s.d. All nematodes were grown at 20°C.

may be induced by thapsigargin treatment, these data suggest that autophagy and ApoE participate with A $\beta$  toxicity through separate mechanisms. Despite this, the relationship between autophagy and calcium is not entirely clear (Sun et al., 2016). Future analyses using

the A $\beta$ +ApoE transgenic worm models could include autophagy, as its component proteins are highly conserved in *C. elegans* (Chang et al., 2017; Martinez et al., 2015; Stavoe et al., 2016).

Induction of autophagy by thapsigargin is reported to occur through stimulation of ER stress (Bernales et al., 2006; Ding et al., 2007; Høyer-Hansen et al., 2007; Kouroku et al., 2007). Although our data suggest divergent participation in protection between autophagy and ApoE, they do not preclude the possibility of ER stress. Whether ApoE $\epsilon$ 2 yields protection by inducing ER stress is unclear. It is, however, unlikely, considering that ApoE $\epsilon$ 4 has been shown to significantly increase ER stress compared with ApoE $\epsilon$ 3 in mice (Verghese et al., 2013; Zhong et al., 2009). In such a paradigm, increased ER stress by ApoE $\epsilon$ 2 would presumably recapitulate ApoE $\epsilon$ 4-associated phenotypes. Further, the protective effect of ApoE $\epsilon$ 2 might not be attributed to differences in ER stress induction, as ApoE $\epsilon$ 2 and ApoE $\epsilon$ 3 have been reported to have no difference in the expression of ER stress targets IRE1 (also known as ERN1), BiP (also known as HSPA5) and CHOP (also known as DDIT3), which increase, instead, with ApoE $\epsilon$ 4 expression (Verghese et al., 2013). Rather, stress and injury typically increase the expression of ApoE in brains (Xu et al., 2006). The effect of increased ApoE expression during stress might be due to mitochondrial interactions, because RNA sequencing of mouse brains revealed *ApoE*-allele-specific responses in mitochondrial gene expression (Babenko et al., 2017; Xu et al., 2006). Indeed, ApoE $\epsilon$ 3 is less likely to be retained at the ER (Brodbeck et al., 2011), and although the retention of ApoE $\epsilon$ 2 in the ER has not been reported, the effect of ER retention is due to the S61R present in ApoE $\epsilon$ 3 and ApoE $\epsilon$ 4, but not present in ApoE $\epsilon$ 2, thus making ApoE $\epsilon$ 2 far less likely to be retained at the ER. Perhaps the additional cysteine residues in ApoE $\epsilon$ 2 compared with ApoE $\epsilon$ 3 or ApoE $\epsilon$ 4 make ApoE $\epsilon$ 2 an agent of redox stabilization at mitochondria during stress (Yamauchi et al., 2017). Additionally, variations in the translocase of outer mitochondrial membrane 40 (TOMM40) and ApoE are associated with differences in longevity (Lin et al., 2016). Notwithstanding, the interaction between ApoE and the ER stress pathway is poorly understood and deserves to be more explicitly delineated.

Yeast and mammalian models have provided insights into the relationship between neurodegenerative disease, calcium and mitochondria that have been further recapitulated in *C. elegans* (Bornhorst et al., 2014; Caraveo et al., 2014; Kim et al., 2018; Martinez et al., 2017b; Ray et al., 2014). Given the decline of the mitochondrial unfolded protein response (UPR<sup>mt</sup>) with aging (Baker and Haynes, 2011), and that ApoE $\epsilon$ 4 increases activity at the mitochondria-associated membrane (MAM) (Tambini et al., 2016), the interaction between ApoE $\epsilon$ 2 and calcium may stabilize the relationship between the ER and the mitochondrion that is otherwise disrupted by A $\beta$  and exacerbated by ApoE $\epsilon$ 4. Fusion, fission and recycling of mitochondria are largely affected by their association with the ER, and ApoE has been observed to elute with MAM fractions (Rusiñol et al., 1994). It is through these MAMs that calcium is transferred between the mitochondrion and ER to regulate cell death and metabolism (Marchi et al., 2018; Patergnani et al., 2011). ApoE $\epsilon$ 4, but not ApoE $\epsilon$ 3, upregulates MAM activity by increasing communication and facilitating function between the ER and the mitochondrion (Tambini et al., 2016). Alterations in the UPR<sup>mt</sup> significantly affected A $\beta$  toxicity in mouse, cell culture and *C. elegans* (Sorrentino et al., 2017). Treatment with doxycycline was found to increase the UPR<sup>mt</sup> through *atfs-1* and reduce A $\beta$ -associated deficits in a *C. elegans* model of A $\beta$  expression in muscles. Indeed, mitochondria secrete a peptide, humanin, under



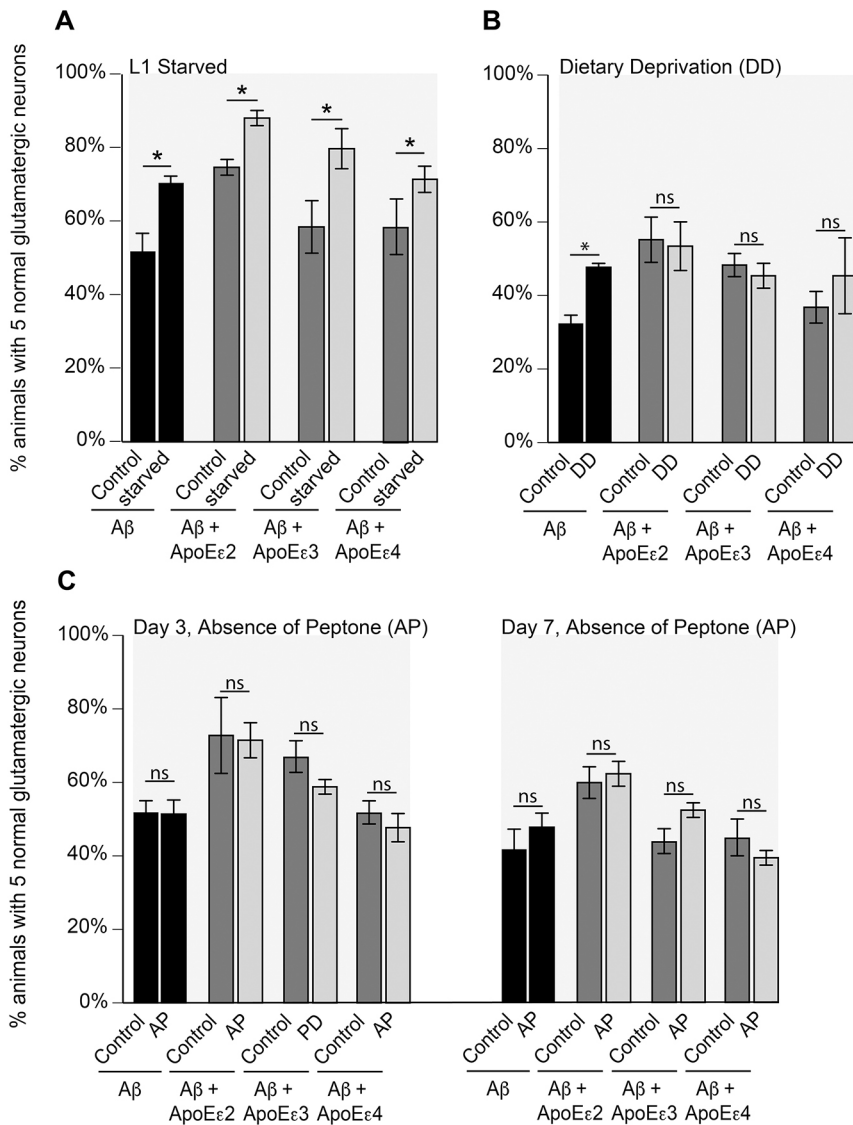

**Fig. 4. Starvation of animals during the L1 larval stage attenuates neurodegeneration in all transgenic strains.** (A) Synchronized animals were deprived of food during the L1 stage and then assayed for neurodegeneration as young adults at day 3 post-hatching. Animals expressing A $\beta$  (UA198;  $P=0.001$ ) exhibited reduced neurodegeneration. Additionally, animals expressing A $\beta$ +ApoE $\epsilon$ 2 (UA351;  $P=0.0156$ ), A $\beta$ +ApoE $\epsilon$ 3 (UA353;  $P=0.0003$ ) or A $\beta$ +ApoE $\epsilon$ 4 (UA355;  $P=0.0201$ ) also displayed reduced neurodegeneration when deprived of food as L1 larvae.  $n=90$  for each line; two-way ANOVA with Sidak's post hoc test. These data are reported as mean normalized to GFP animals $\pm$ s.d. All nematodes were grown at 20°C. (B) On the second day of adulthood (day 5 post-hatching), animals were moved to plates absent of bacteria, according to the dietary-deprivation regimen outlined by Greer and Brunet (2009), which reported that dietary-deprivation-dependent lifespan extension was dependent on *hsf-1*. Neurodegeneration analysis of dietary-deprived animals was performed on day 7 post-hatching. Dietary deprivation reduced neurodegeneration in animals expressing A $\beta$  alone (UA198;  $P=0.0107$ ), but there was not a significantly additive effect in either A $\beta$ +ApoE $\epsilon$ 2 (UA351;  $P=0.9909$ ), A $\beta$ +ApoE $\epsilon$ 3 (UA353;  $P=0.9441$ ) or A $\beta$ +ApoE $\epsilon$ 4 (UA355;  $P=0.2421$ ) *C. elegans*. These data are reported as mean normalized to GFP animals $\pm$ s.d.  $n=90$  for each line; \* indicates statistical significance; ns, not significant; two-way ANOVA with Sidak's post hoc test. All nematodes were grown at 20°C. (C) The absence of peptone has been reported to increase lifespan through the AMP-activated protein kinase, AAK-2, and the insulin-like signaling protein, DAF-16. Synchronized animals were grown at 20°C on either NGM with a standard final peptone concentration of 2.5 g/l or NGM without peptone and analyzed at days 3 and 7 post-hatching. Absence of peptone had no effect on A $\beta$  alone (UA198; day 3,  $P=0.9998$ ; day 7,  $P=0.2740$ ), A $\beta$ +ApoE $\epsilon$ 2 (UA351; day 3,  $P=0.9965$ ; day 7,  $P=0.9230$ ), A $\beta$ +ApoE $\epsilon$ 3 (UA353; day 3,  $P=0.2798$ ; day 7,  $P=0.0653$ ) or A $\beta$ +ApoE $\epsilon$ 4 (UA355; day 3,  $P=0.8268$ ; day 7,  $P=0.3279$ ). These data are reported as mean normalized to GFP animals $\pm$ s.d.  $n=90$  for each line; \* indicates statistical significance; ns, not significant; two-way ANOVA with Sidak's post hoc test.

stress conditions to modulate MAMs and protect against cell death (Sreekumar et al., 2017). Supplementation of a humanin derivative reduced cognitive defects in a transgenic AD mouse model (Niikura et al., 2011). Future work would include measuring changes in intracellular calcium with expression of the different *APOE* alleles, to determine whether these changes are dependent on the mitochondrial calcium uniporter or ER stress, and how these affect mitochondrial stability towards neuronal integrity. As such, this model provides a potent medium with which to further understand and probe these interactions for therapeutic targets.

Loss or depletion of the insulin signaling receptor, *daf-2*, doubles lifespan in *C. elegans* (Kenyon et al., 1993) in a manner that is independent of autophagy (Greer and Brunet, 2009). In *C. elegans* models of proteotoxicity, loss of *daf-2* reduces  $\alpha$ -synuclein-mediated neurodegeneration (Knight et al., 2014; Ray et al., 2014), paralysis-induced poly-Q toxicity (Steinkraus et al., 2008) and paralysis-induced A $\beta$  toxicity (Cohen et al., 2006; Florez-McClure et al., 2007; Steinkraus et al., 2008). Furthermore, loss of *daf-2* decreases A $\beta$  toxicity (Steinkraus et al., 2008) by increasing the autophagic clearance of A $\beta$  (Florez-McClure et al., 2007). However, different longevity association pathways are activated in response to diverse dietary restriction regimens (Greer and Brunet, 2009). Peptone

absence extends lifespan through *aak-2* and FOXO/*daf-16*, but yielded no change in neurodegeneration, suggesting that *daf-2*-mediated protection observed in other A $\beta$  models (Cohen et al., 2006) might be engaged through downstream mechanisms in parallel with AAK-2 activation of FOXO/*daf-16*. For example, reduced insulin-like signaling decreased A $\beta$  accumulation by elevating autophagy and lysosome populations (Florez-McClure et al., 2007). In the dietary deprivation model, the extension of lifespan requires *hsf-1*. In such a model, it is feasible that the complete absence of food during the first larval stage could activate responses controlled by HSF-1 activity independently of expression of any *APOE* allele (Steinkraus et al., 2008). However, this would stand in opposition to the *hsf-1*-dependent dietary deprivation model that begins starvation 2 days into adulthood (Greer and Brunet, 2009; Steinkraus et al., 2008), but was only protective with A $\beta$  alone (Fig. 4B), suggesting an interaction between ApoE in the dietary deprivation model that does not take place in the L1 starvation model. We show a potent neuroprotective effect of two different dietary restriction regimens that interact differently with ApoE in A $\beta$  toxicity *in vivo* (Fig. 4A,B). Considering the robust understanding and utility of *C. elegans* in aging research, this model opens avenues for more thorough examination of the relationships between longevity pathways, ApoE and A $\beta$ .

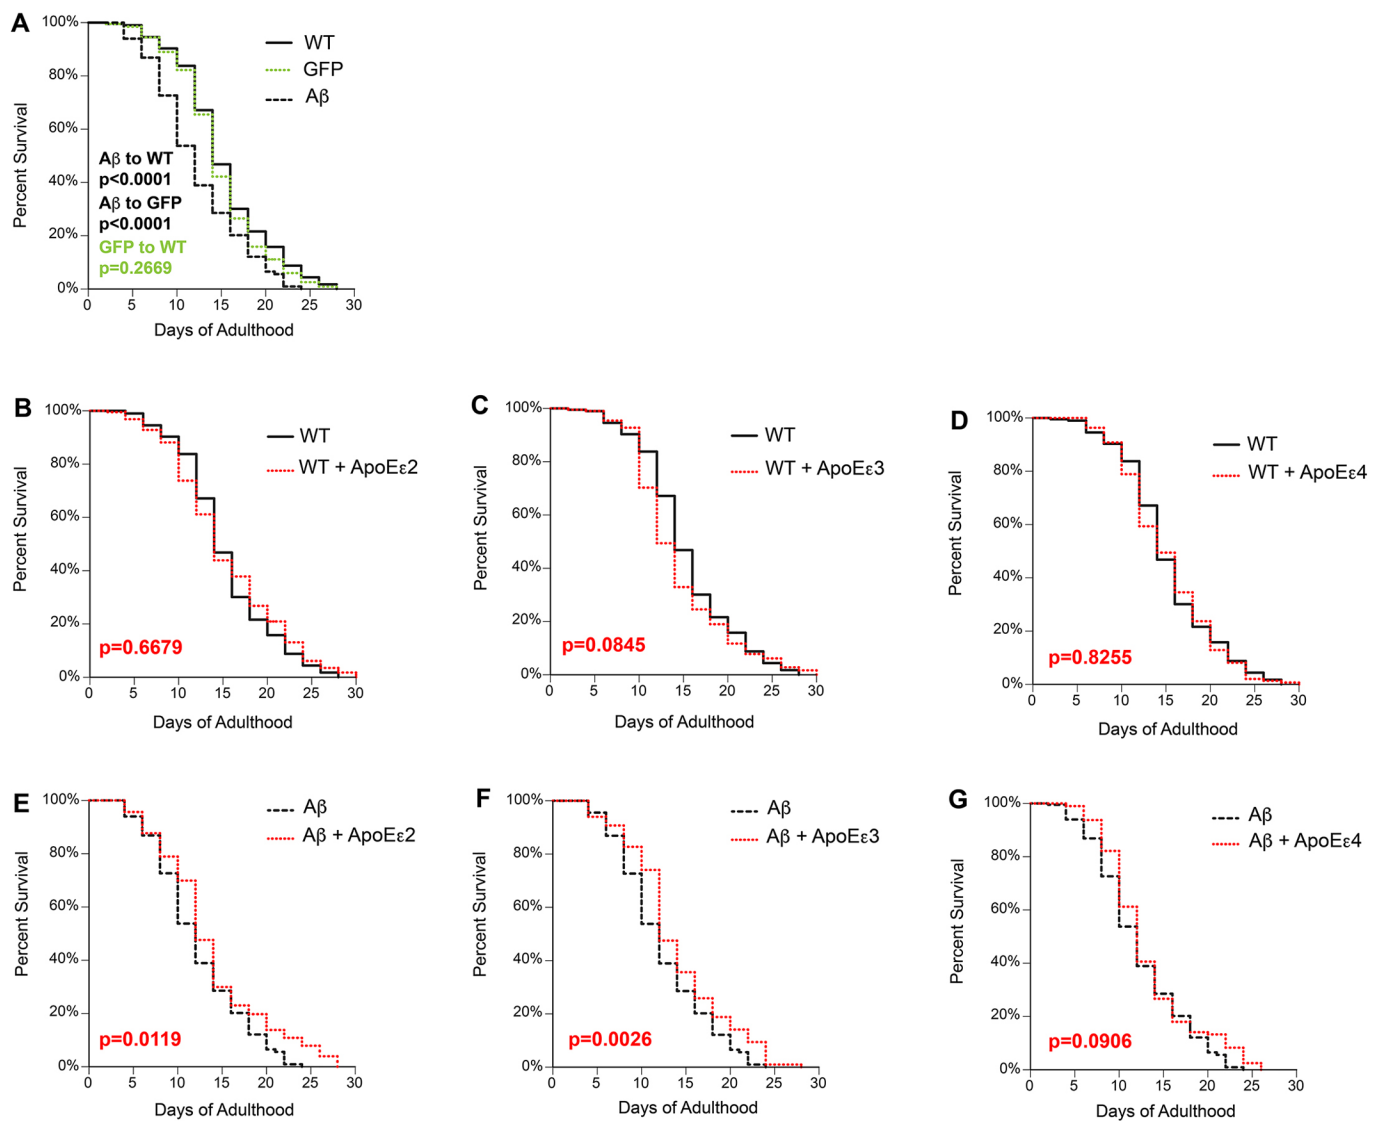

**Fig. 5. Effects of apolipoprotein E isoforms and A $\beta$  expression on *C. elegans* survival.** Animal populations were synchronized by a 2-h egg lay and maintained at 20°C. The L4 molt was defined as  $t=0$ , and survival was assessed by scoring response to mechanical probing. (A) A $\beta$  expression (UA198) significantly reduced survival, compared with the survival curves for both wild-type (WT) N2 nematodes ( $P < 0.0001$ ) and nematodes expressing GFP alone in glutamatergic neurons (DA1240;  $P < 0.0001$ ). There was no significant difference between N2 and expression of GFP alone (DA1240;  $P = 0.2669$ ). (B-D) Survival curves comparing N2 with ApoE $\epsilon$ 2 {UA350 (*baln50*[ $P_{eat-4}::APOE\epsilon 2$ ,  $P_{unc-54}::tdTomato$ ])} (B), ApoE $\epsilon$ 3 {UA352 (*baln50*[ $P_{eat-4}::APOE\epsilon 3$ ,  $P_{unc-54}::tdTomato$ ])} (C) and ApoE $\epsilon$ 4 {UA354 (*baln50*[ $P_{eat-4}::APOE\epsilon 4$ ,  $P_{unc-54}::tdTomato$ ])} (D). Survival curves were not significantly different between N2 and ApoE $\epsilon$ 2 (UA350;  $P = 0.6679$ ), N2 and ApoE $\epsilon$ 3 (UA352;  $P = 0.0845$ ), or N2 and ApoE $\epsilon$ 4 (UA354;  $P = 0.8255$ ). (E-G) Survival curves comparing A $\beta$  with A $\beta$ +ApoE $\epsilon$ 2 (E), A $\beta$ +ApoE $\epsilon$ 3 (F) and A $\beta$ +ApoE $\epsilon$ 4 (G). (E) The presence of ApoE $\epsilon$ 2 with A $\beta$  (UA351) significantly increases survival compared with A $\beta$  alone ( $P = 0.0119$ ). (F) Survival was also significantly increased in A $\beta$ +ApoE $\epsilon$ 3 (UA353) compared with A $\beta$  alone ( $P = 0.0026$ ). (G) In contrast, A $\beta$ +ApoE $\epsilon$ 4 (UA355) did not significantly alter survival ( $P = 0.0906$ ).  $n = 200$  for each line. The log-rank (Mantel-Cox) method to account for differences in survival was applied for statistical analysis of all strains.

Although ApoE is associated with longevity (Fuku et al., 2017; Lin et al., 2016; Schächter et al., 1994; Skillbäck et al., 2018), it is not clear how ApoE interacts with other longevity-associated pathways, especially when challenged by A $\beta$ -induced proteostatic stress. A more thorough understanding of transcriptional changes with ApoE expression would shed light on the neuronal effect of ApoE that drives the differences between L1 starvation and dietary deprivation models. ApoE $\epsilon$ 4 has been observed to translocate to the nucleus and alter gene expression by altering transcriptional regulation (Lattanzio et al., 2014; Theendakara et al., 2013, 2016). Many of these genes appear conserved from *C. elegans* to humans and might have similar implications for metabolism, stress response and aging (Arey and Murphy, 2017; Vahdati Nia et al., 2017). Thus,

future studies combining transcriptional profiling of the ApoE-A $\beta$  transgenics with RNAi or genetic depletion of up- or downregulated target genes would be informative.

Aging remains the most definitive risk factor for AD. Therefore, it is significant to note that, in the absence A $\beta$ , none of the *APOE* alleles had an effect on survival (Fig. 5B-D). However, when independently co-expressed with A $\beta$ , both *APOE* $\epsilon$ 2 and *APOE* $\epsilon$ 3 attenuated the shortened survival caused by A $\beta$  (Fig. 5A,E,F). Although the observed differences between the survival curves were modest, they were statistically significant. In contrast, *APOE* $\epsilon$ 4 did not confer any significant effect (Fig. 5G). One possibility to explain these results is that the shortened survival induced by A $\beta$  (Fig. 5A) is a consequence of glutamatergic neuron failure to accurately control feeding

behaviors and fat storage (Chun et al., 2015; Hamilton et al., 2005; Lee and Ashrafi, 2008; Greer and Brunet, 2009; Greer et al., 2008; Hills et al., 2004; Kindt et al., 2007; Lee et al., 2008; Zheng et al., 1999). Because the glutamatergic neuronal circuitry modulates feeding behaviors, A $\beta$  might possibly depress survival through dysfunctional feeding, which is hitherto repressed by the protection of neuronal structure observed with *APOE $\epsilon$ 2* co-expression. The ability of the *APOE $\epsilon$ 2* allele to reduce survival depression by A $\beta$  would therefore be due to restored glutamatergic connectivity through the associated neuroprotective phenotypes. Uninhibited feeding, in combination with the utilization of fat storage from loss of glutamatergic signaling, potentially incites insulin signaling responses that influence longevity (Greer et al., 2008; Gusarov et al., 2017). The connection between insulin signaling and longevity was first realized in *C. elegans* (Kenyon et al., 1993). Clinical research shows a complex relationship between diabetes, AD and ApoE $\epsilon$ 4 (Arnold et al., 2018). Administration of insulin facilitated memory recall in patients carrying *APOE $\epsilon$ 2* or *APOE $\epsilon$ 3*, but further impaired recollection in *APOE $\epsilon$ 4* patients (Reger et al., 2006). Considering the history and utility of *C. elegans* in the study of aging, we propose this model would be an effective tool to study the relationship between aging, insulin signaling and ApoE variants in A $\beta$ -induced neurodegeneration.

It should be noted that known functions of ApoE are not limited to the nervous system (McNeill et al., 2010; Rosenson et al., 2017; Zhang et al., 2010). By restricting the expression of alleles to a single cell type, as in our model, the cellular and subcellular effects can be isolated from the emergent effects of endogenous expression that would otherwise compound the complexity underlying A $\beta$ -mediated neurodegeneration. Furthermore, that *C. elegans* has no endogenous ApoE ortholog allows use of this model for dissection of the interactions between ApoE and evolutionarily conserved pathways without obfuscation from other perturbations, such as immunological and hepatic responses typically associated with ApoE. Because of the genetic and pharmacological amenability of *C. elegans*, screening for modifiers of ApoE-A $\beta$  activity is tenable. Additional phenotypic outputs might provide further insight into nuances of ApoE-induced effects. Because the glutamatergic signaling that regulates fat storage in response to food also modulates pharyngeal pumping rate (Greer and Brunet, 2009), both fat storage (Yen et al., 2010) and pharyngeal pumping (Sanders et al., 2017) are potential quantifiable outputs of glutamatergic signaling. Likewise, the olfactory circuit is modulated by glutamatergic signaling (Chalasanani et al., 2007), exhibiting quantifiable changes in turning and reversals (Bhattacharya et al., 2014; Xiao et al., 2015) in response to specific odors (Chalasanani et al., 2010). Furthermore, the *C. elegans* olfactory circuitry is a workshop for research in the neurobiological basis of learning (Cho et al., 2016). Consequently, candidate compounds can be tested for their effects on neurodegeneration, and also how they affect neuron function and animal health. Thus, this model provides a new medium through which neuronal mechanisms of ApoE can be distinctly probed to expedite the identification of therapeutic targets and risk factors to better address the urgent and unmet societal burden represented by AD.

## MATERIALS AND METHODS

### Plasmid construction

The cDNAs of the human *APOE* alleles were a generous gift from Susan Lindquist. The cDNAs were cloned by Gateway Technology (Invitrogen) according to the manufacturer's protocol. Briefly, primers 5'-GGGGACA-AGTTTGTACAAAAAGCAGGCTCCatgcataaggtttgctggcactgtcttattcttctctggaccagcaATGaaaggtggagcaagcgggtg-3' and 5'-ggggaccactttgtacaag-

aaagctgggtcCTAcagtgattgtcgtggcac-3' were used to amplify the *APOE* alleles and amplicons were recombined with pDONR221 by BP reaction to generate entry clones. Entry clones were confirmed by sequencing and recombined with *P<sub>eat-4</sub>* expression vectors by LR reaction. Expression clones were confirmed by sequencing.

### C. elegans strains

*C. elegans* were maintained following standard procedures (Brenner, 1974). To generate the worm ApoE models (Table 1), expression constructs were injected into Bristol N2 animals at 50 ng/ $\mu$ l with the co-injection marker transgene (*P<sub>unc-54</sub>::tdTomato*) at 50 ng/ $\mu$ l. At least three stable independent lines were generated, crossed with UA198 (*baln34*[*P<sub>eat-4</sub>::A $\beta$* , *P<sub>myo-2</sub>::mCherry*]; *adls1240*[*P<sub>eat-4</sub>::GFP*]) and analyzed for each *C. elegans* transgenic construct. Representative transgenic lines were selected and the corresponding transgenic lines in the N2 background were integrated using a Spectrolinker XL-1500 (Spectronics Corporation, Westbury, NY, USA). Integrated strains were outcrossed three times to N2 worms to generate the following strains: UA350 (*baln50*[*P<sub>eat-4</sub>::APOE $\epsilon$ 2*, *P<sub>unc-54</sub>::tdTomato*]), UA352 (*baln51*[*P<sub>eat-4</sub>::APOE $\epsilon$ 3*, *P<sub>unc-54</sub>::tdTomato*]) and UA354 (*baln52*[*P<sub>eat-4</sub>::APOE $\epsilon$ 4*, *P<sub>unc-54</sub>::tdTomato*]) (Table 1). These were crossed with UA198 to generate the following strains: UA351 (*baln50*[*P<sub>eat-4</sub>::APOE $\epsilon$ 2*, *P<sub>unc-54</sub>::tdTomato*]; *baln34*[*P<sub>eat-4</sub>::A $\beta$* , *P<sub>myo-2</sub>::mCherry*]; *adls1240*[*P<sub>eat-4</sub>::GFP*]), UA353 (*baln51*[*P<sub>eat-4</sub>::APOE $\epsilon$ 3*, *P<sub>unc-54</sub>::tdTomato*]; *baln34*[*P<sub>eat-4</sub>::A $\beta$* , *P<sub>myo-2</sub>::mCherry*]; *adls1240*[*P<sub>eat-4</sub>::GFP*]) and UA355 (*baln52*[*P<sub>eat-4</sub>::APOE $\epsilon$ 4*, *P<sub>unc-54</sub>::tdTomato*]; *baln34*[*P<sub>eat-4</sub>::A $\beta$* , *P<sub>myo-2</sub>::mCherry*]; *adls1240*[*P<sub>eat-4</sub>::GFP*]) (Table 1). They were also crossed with DA1240 to generate strains UA356 {*adls1240*[*P<sub>eat-4</sub>::GFP+lin-15(+)*]; *baln50*[*P<sub>eat-4</sub>::APOE $\epsilon$ 2*, *P<sub>unc-54</sub>::tdTomato*]}, UA357 {*adls1240*[*P<sub>eat-4</sub>::GFP+lin-15(+)*]; *baln50*[*P<sub>eat-4</sub>::APOE $\epsilon$ 3*, *P<sub>unc-54</sub>::tdTomato*]}, and UA358 {*adls1240*[*P<sub>eat-4</sub>::GFP+lin-15(+)*]; *baln50*[*P<sub>eat-4</sub>::APOE $\epsilon$ 4*, *P<sub>unc-54</sub>::tdTomato*]}. To generate conditional RNAi-sensitive strains, N2 animals were injected with the glutamatergic neuron promoter-*sid-1* construct (*P<sub>eat-4</sub>::sid-1*) with a co-injection marker (*P<sub>dat-1</sub>::GFP*), integrated and outcrossed as previously described, to produce strain UA311 (*baln53*[*P<sub>eat-4</sub>::sid-1*, *P<sub>dat-1</sub>::GFP*]). This strain was then crossed with the *sid-1(pk3321)* mutant to generate strain UA359 {*sid-1(pk3321)*; *baln53*[*P<sub>eat-4</sub>::sid-1*, *P<sub>dat-1</sub>::GFP*]; *adls1240*[*P<sub>eat-4</sub>::GFP*]}, which was subsequently crossed with UA198 to produce UA360 {*sid-1(pk3321)*; *baln53*[*P<sub>eat-4</sub>::sid-1*, *P<sub>dat-1</sub>::GFP*]; *adls1240*[*P<sub>eat-4</sub>::GFP*]; *baln34*[*P<sub>eat-4</sub>::A $\beta$* , *P<sub>myo-2</sub>::mCherry*]}. The RNAi-sensitive UA198 was then crossed with each of the A $\beta$ +ApoE strains to produce UA364 {*sid-1(pk3321)*; *baln53*[*P<sub>eat-4</sub>::sid-1*, *P<sub>dat-1</sub>::GFP*]; *adls1240*[*P<sub>eat-4</sub>::GFP*]; *baln50*[*P<sub>eat-4</sub>::APOE $\epsilon$ 2*, *P<sub>unc-54</sub>::tdTomato*]; *baln34*[*P<sub>eat-4</sub>::A $\beta$* , *P<sub>myo-2</sub>::mCherry*]}, UA365 {*sid-1(pk3321)*; *baln53*[*P<sub>eat-4</sub>::sid-1*, *P<sub>dat-1</sub>::GFP*]; *adls1240*[*P<sub>eat-4</sub>::GFP*]; *baln51*[*P<sub>eat-4</sub>::APOE $\epsilon$ 3*, *P<sub>unc-54</sub>::tdTomato*]; *baln34*[*P<sub>eat-4</sub>::A $\beta$* , *P<sub>myo-2</sub>::mCherry*]}, and UA366 {*sid-1(pk3321)*; *baln53*[*P<sub>eat-4</sub>::sid-1*, *P<sub>dat-1</sub>::GFP*]; *adls1240*[*P<sub>eat-4</sub>::GFP*]; *baln52*[*P<sub>eat-4</sub>::APOE $\epsilon$ 4*, *P<sub>unc-54</sub>::tdTomato*]; *baln34*[*P<sub>eat-4</sub>::A $\beta$* , *P<sub>myo-2</sub>::mCherry*]}.

**Neurodegeneration analysis**

Animals for analysis were synchronized with a 3-h egg lay using gravid hermaphrodites and incubated at 20°C, unless otherwise specified. To examine the neurons, hermaphrodites at indicated post-hatching time points were immobilized using 3 mM levamisole on glass cover slips and inverted onto 2% agarose pads on microscope slides. Each analysis was replicated at least three times with 30 animals per condition (30 animals $\times$ 3 trials=90). *C. elegans* glutamatergic neurons were analyzed for neurodegeneration as previously described (Matlack et al., 2014; Tardiff et al., 2012, 2017; Treusch et al., 2011). Briefly, animals were scored for glutamatergic neurodegeneration at days 3 and 7 post-hatching, as reported in the Results and in figure legends. An animal was scored as normal if all five tail neurons were present and without malformities such as distention, apoptotic swelling, axon breaks, separation of the soma or loss of fluorescence.

### Mechanosensation assay

Assays were performed as previously described (Chalfie and Sulston, 1981; Chalfie et al., 1985). Briefly, animal populations were synchronized by a 3-h egg lay and progeny were incubated at 20°C until day 4 post-hatching.

*C. elegans* sensitivity to soft touch was assayed by gently stroking hermaphrodite animals on the posterior and anterior with an eyelash hair glued to the end of a Pasteur pipette. Backward locomotion was induced by gently stroking the head of the animal with the eyelash followed by stroking the tail just below the anus. A positive result for soft touch sensitivity was recorded if the animal ceased backward locomotion or began moving forward. This process was repeated five times per animal, and the number of positive responses to posterior soft touch out of five was recorded. A total of 30 worms per strain were scored per biological replicate and percentage posterior touch response was calculated as the percentage average response within the population. The experiment was repeated at least three times ( $n=3 \times 30=90$ ) and data represent the average of all three biological replicates with s.e.m., as previously reported (Zhang et al., 2004).

### RT-qPCR

Quantitative PCR reactions were performed using IQ SYBR Green Supermix (Bio-Rad, Hercules, CA, USA) with the CFX96 Real-Time System (Bio-Rad) as described previously (Thompson et al., 2014). The following primer sequences were used: *APOE* Forward 5'-cctggacgaggtgaaggagca-3', Reverse 5'-ctcgaaccagctcttgaggc-3'; *tba-1* Forward 5'-atctctgctgacaaggcttac-3', Reverse 5'-gtacaagagcacaacgcat-3'; *snb-1* Forward 5'-ccggatagaccatcttgagc-3', Reverse 5'-gacgactcatcaacctgagc-3'. Full-length gene sequences were obtained from WormBase and primers were evaluated for potential secondary structures of the amplicon by MFOLD software (<http://unafold.ma.albany.edu/?q=mfold>). MFOLD analysis was performed by adjusting the values to 50 mM Na<sup>+</sup>, 3 mM Mg<sup>2+</sup> and 60°C annealing temperature.

At least 100 animals from each strain {UA356 [*adIs1240*(*P<sub>eat-4</sub>::GFP+lin-15(+)*); *baIn50*(*P<sub>eat-4</sub>::APOEε2*, *P<sub>unc-54</sub>::tdTomato*)], UA357 [*adIs1240*(*P<sub>eat-4</sub>::GFP+lin-15(+)*); *baIn50*(*P<sub>eat-4</sub>::APOEε3*, *P<sub>unc-54</sub>::tdTomato*)] and UA358 [*adIs1240*(*P<sub>eat-4</sub>::GFP+lin-15(+)*); *baIn50*(*P<sub>eat-4</sub>::APOEε4*, *P<sub>unc-54</sub>::tdTomato*)]} were cultivated at 20°C, collected and RNA was harvested by Tri Reagent (Molecular Research Center, Cincinnati, OH, USA), according to the manufacturer's guidelines. Following DNase treatment (Promega, Madison, WI, USA), cDNA strands were generated using the iScript cDNA synthesis kit (Bio-Rad). PCR efficiency was calculated from standard curves that were generated using serial dilutions of cDNA of all samples. Amplification was not detected in no template and no reverse transcriptase controls. The Cq quantification cycle values were recorded and consolidated by CFX Manager Software version 3.0 (Bio-Rad), then exported to Prism for one-way ANOVA. These data are represented as the mean of three biological replicates per targeted gene, each with three technical replicates and s.e.m. to represent the true mean of the populations. Reference genes *tba-1* and *snb-1* were used as internal controls. Relative mRNA expression levels were normalized using these reference control genes.

### RNAi

RNAi feeding clones were cultivated initially on LB solid medium containing tetracycline (5 µg/ml) and ampicillin (100 µg/ml) and then individual colonies were grown overnight in liquid LB medium containing 50 µg/ml carbenicillin. Isopropyl β-D-1-thiogalactopyranoside (IPTG) was spread on plates to a final concentration of 100 µM, seeded with RNAi feeding clones and allowed to dry. Induction of dsRNA occurred during a 14- to 18-h incubation at 20°C. Adult hermaphrodites were allowed to lay eggs for 3 h on RNAi feeding clones to produce a synchronized population. Glutamatergic neurons of synchronized progeny were analyzed at least 2 days after hatching, as described above.

### L1 starvation

Age-synchronized populations of each *C. elegans* strain were generated by bleaching. Briefly, 10 ml bleaching solution (1 ml 5N KOH, 2 ml bleach, 7 ml ddH<sub>2</sub>O) was used to isolate embryos. Embryos were then washed three times in 10 ml 1× M9 buffer to remove bleaching solution. Embryos were then transferred to standard NGM plates seeded with 200 µl OP50 bacteria or NGM plates containing no bacteria. After 24 h, animals were moved to NGM plates seeded with 200 µl OP50. Animals were incubated at 20°C for a total of 96 h and then 90 worms per strain were assayed for neurodegeneration.

### Peptone absence

Animals and media were prepared as previously described (Greer and Brunet, 2009). Briefly, age-synchronized populations of animals were obtained by allowing gravid adults to lay eggs for 3 h at 20°C on NGM plates containing either the standard quantity of peptone (2.5 g/l), as our control, or no peptone, and seeded with OP50 at a concentration of  $5 \times 10^{12}$  CFU/ml. Animals were maintained at 20°C and transferred as necessary until scoring for neurodegeneration.

### Dietary deprivation

Animals and media were prepared as previously described (Lee et al., 2006). Briefly, age-synchronized populations of animals were obtained by allowing gravid adults to lay eggs for 3 h at 20°C on seeded NGM plates. Animals were transferred to fresh seeded plates as necessary until day 2 of adulthood (day 5 post-hatching), at which point they were either transferred to seeded plates as they had been previously (*ad libitum* condition) or transferred to unseeded plates (dietary deprivation). Animals were maintained for neurodegeneration analysis at day 7 post-hatching.

### Survival assays

Survival assays were performed as previously described (Hsin and Kenyon, 1999). Briefly, strains were allowed to grow at 20°C in optimal growth conditions for at least two generations before the experiment began. Synchronized animal populations for survival analysis were generated by a 1-h egg lay using gravid hermaphrodites and incubated at 20°C. The L4 molt was defined as  $t=0$ , at which time animals were transferred to experimental plates. A total of 200 animals for each of nine strains were examined and all strains were assigned five initial plates with 40 worms each. Animals were then transferred to new plates every day, until the worms' reproductive stage had passed, after which point animals were then transferred every other day to ensure that appropriate amounts of food remained on the plate. Survival was assessed immediately after each transfer, as previously described (Hsin and Kenyon, 1999). To score for death, animals were examined for locomotive response to prodding with a platinum wire. Briefly, animals were touched five times on the head and the tail and assessed for reverse or forward locomotion in response. Animals were classified as dead if they ceased moving and failed to respond to this stimulation. A third category, censored, was utilized for animals that did not die of the natural aging process. Worms were classified as censored if they crawled off the plate, burrowed, or displayed vulval rupture or internal hatching, as previously described (Hsin and Kenyon, 1999). Seeded plates were stored at 20°C until completion. In GraphPad Prism software, the log-rank (Mantel–Cox) method was used to account for differences between survival curves. Specifically, all time points are assigned equal weights in statistical calculations whereby the entire pattern or path of the curve is being analyzed in testing for significance, not just the maximum value displayed (Hansen et al., 2008).

### Pharmacological treatments

Thapsigargin (Acros Organics) was dissolved in dimethyl sulfoxide (DMSO) and added to NGM plates to a final concentration of 3 µg/ml, as reported previously (Zwaal et al., 2001), with the modification that thapsigargin was added directly to the medium rather than supplemented on the surface.

### Experimental design and statistical analysis

Hermaphrodites were analyzed, which is standard in the *C. elegans* field, and all animals were incubated at 20°C, unless otherwise specified. In all cases, sample sizes (typically 30 animals per condition; for a total of 90 animals) were standardized within each experiment and examined in a uniform fashion. All experiments used at least three independent replicates per experiment per variable to generate a mean and s.d. In experiments using one independent variable across multiple tested effects (e.g. neuron cell death as a function of construct type), a one-way ANOVA series was used with a multiple-comparisons post hoc test (Tukey's). For grouped analyses, a two-way ANOVA series was used with Sidak's post hoc test. Survival was analyzed by the log-rank (Mantel–Cox) method, as previously described in

the survival assay section.  $P < 0.05$  was the absolute minimum threshold for statistical significance. Statistics were performed using GraphPad Prism software.

#### Acknowledgements

We are grateful to all members of the Caldwell Lab for their collegiality and teamwork. Special thanks to Bryan Martinez for discussions. This paper is dedicated to the memory of our collaborator and friend, Susan Lindquist, whose insight and vision served as an impetus for this research.

#### Competing interests

The authors declare no competing or financial interests.

#### Author contributions

Conceptualization: E.F.G., K.A.C., G.A.C.; Methodology: E.F.G., S.E.S., C.A.S., A.C.H., L.A.B., K.A.C., G.A.C.; Software: E.F.G., K.A.C.; Validation: E.F.G.; Formal analysis: E.F.G., S.E.S., C.A.S., A.C.H., M.A.V., R.A.T., G.A.C.; Investigation: E.F.G., S.E.S., C.A.S., A.C.H., M.A.V., R.A.T., L.A.B., K.A.C.; Resources: E.F.G., L.A.B., G.A.C.; Data curation: E.F.G., L.A.B., K.A.C., G.A.C.; Writing - original draft: E.F.G.; Writing - review & editing: E.F.G., S.E.S., C.A.S., K.A.C., G.A.C.; Visualization: E.F.G., S.E.S., C.A.S., K.A.C.; Supervision: E.F.G., L.A.B., K.A.C., G.A.C.; Project administration: L.A.B., K.A.C., G.A.C.; Funding acquisition: G.A.C.

#### Funding

This research was initiated with support of a Collaborative Innovation Award (to G.A.C.) from the Howard Hughes Medical Institute. Other support came from the College of Arts and Sciences, The University of Alabama (to A.C.H., S.E.S. and R.A.T.).

#### References

- Arey, R. N. and Murphy, C. T. (2017). Conserved regulators of cognitive aging: From worms to humans. *Behav. Brain Res.* **322**, 299-310.
- Arnold, S. E., Arvanitakis, Z., MacCauley-Rambach, S. L., Koenig, A. M., Wang, H.-Y., Ahima, R. S., Craft, S., Gandy, S., Buettner, C., Stoekel, L. E. et al. (2018). Brain insulin resistance in type 2 diabetes and Alzheimer disease: concepts and conundrums. *Nat. Rev. Neurol.* **14**, 168-181.
- Babenko, V. N., Smagin, D. A. and Kudryavtseva, N. N. (2017). RNA-Seq mouse brain regions expression data analysis: focus on ApoE functional network. *J. Integr. Bioinform.* **14**, 10.1515/jib-2017-0024.
- Baker, B. M. and Haynes, C. M. (2011). Mitochondrial protein quality control during biogenesis and aging. *Trends Biochem. Sci.* **36**, 254-261.
- Bernales, S., McDonald, K. L. and Walter, P. (2006). Autophagy counterbalances endoplasmic reticulum expansion during the unfolded protein response. *PLoS Biol.* **4**, e423.
- Bhattacharya, R., Touroutine, D., Barbagallo, B., Climer, J., Lambert, C. M., Clark, C. M., Alkema, M. J. and Francis, M. M. (2014). A conserved dopamine-cholecystokinin signaling pathway shapes context-dependent Caenorhabditis elegans behavior. *PLoS Genet.* **10**, e1004584.
- Bien-Ly, N., Andrews-Zwilling, Y., Xu, Q., Bernardo, A., Wang, C. and Huang, Y. (2011). C-terminal-truncated apolipoprotein (apo) E4 inefficiently clears amyloid-beta (A $\beta$ ) and acts in concert with A $\beta$  to elicit neuronal and behavioral deficits in mice. *Proc. Natl. Acad. Sci. USA* **108**, 4236-4241.
- Bornhorst, J., Chakraborty, S., Meyer, S., Lohren, H., Brinkhaus, S. G., Knight, A. L., Caldwell, K. A., Caldwell, G. A., Karst, U., Schwerdtle, T. et al. (2014). The effects of pdr1, djr1.1 and pink1 loss in manganese-induced toxicity and the role of  $\alpha$ -synuclein in C. elegans. *Metallomics* **6**, 476-490.
- Brecht, W. J., Harris, F. M., Chang, S., Tesseur, I., Yu, G.-Q., Xu, Q., Dee Fish, J., Wyss-Coray, T., Buttini, M., Mucke, L. et al. (2004). Neuron-specific apolipoprotein e4 proteolysis is associated with increased tau phosphorylation in brains of transgenic mice. *J. Neurosci.* **24**, 2527-2534.
- Brenner, S. (1974). The genetics of Caenorhabditis elegans. *Genetics* **77**, 71-94.
- Brodbeck, J., McGuire, J., Liu, Z., Meyer-Franke, A., Balestra, M. E., Jeong, D., Pleiss, M., McComas, C., Hess, F., Witter, D. et al. (2011). Structure-dependent impairment of intracellular apolipoprotein E4 trafficking and its detrimental effects are rescued by small-molecule structure correctors. *J. Biol. Chem.* **286**, 17217-17226.
- Bu, G. (2009). Apolipoprotein E and its receptors in Alzheimer's disease: pathways, pathogenesis and therapy. *Nat. Rev. Neurosci.* **10**, 333-344.
- Burdick, D., Soreghan, B., Kwon, M., Kosmoski, J., Knauer, M., Henschen, A., Yates, J., Cotman, C. and Glabe, C. (1992). Assembly and aggregation properties of synthetic Alzheimer's A $\beta$ /beta amyloid peptide analogs. *J. Biol. Chem.* **267**, 546-554.
- Caraveo, G., Auluck, P. K., Whitesell, L., Chung, C. Y., Baru, V., Mosharof, E. V., Yan, X., Ben-Johny, M., Soste, M., Picotti, P. et al. (2014). Calcineurin determines toxic versus beneficial responses to  $\alpha$ -synuclein. *Proc. Natl. Acad. Sci. USA* **111**, E3544-E3552.
- Cha, M.-Y., Han, S.-H., Son, S. M., Hong, H.-S., Choi, Y.-J., Byun, J. and Mook-Jung, I. (2012). Mitochondria-specific accumulation of amyloid  $\beta$  induces mitochondrial dysfunction leading to apoptotic cell death. *PLoS ONE* **7**, e34929.
- Chalasan, S. H., Chronis, N., Tsunozaki, M., Gray, J. M., Ramot, D., Goodman, M. B. and Bargmann, C. I. (2007). Dissecting a circuit for olfactory behaviour in Caenorhabditis elegans. *Nature* **450**, 63-70.
- Chalasan, S. H., Kato, S., Albrecht, D. R., Nakagawa, T., Abbott, L. F. and Bargmann, C. I. (2010). Neuropeptide feedback modifies odor-evoked dynamics in Caenorhabditis elegans olfactory neurons. *Nat. Neurosci.* **13**, 615-621.
- Chalfie, M. and Sulston, J. (1981). Developmental genetics of the mechanosensory neurons of Caenorhabditis elegans. *Dev. Biol.* **82**, 358-370.
- Chalfie, M., Sulston, J., White, J., Southgate, E., Thomson, J. and Brenner, S. (1985). The neural circuit for touch sensitivity in Caenorhabditis elegans. *J. Neurosci.* **5**, 956-964.
- Chang, J. T., Kumsta, C., Hellman, A. B., Adams, L. M. and Hansen, M. (2017). Spatiotemporal regulation of autophagy during Caenorhabditis elegans aging. *Elife* **6**, e18459.
- Chen, Y., Durakoglugil, M. S., Xian, X. and Herz, J. (2010). ApoE4 reduces glutamate receptor function and synaptic plasticity by selectively impairing ApoE receptor recycling. *Proc. Natl. Acad. Sci. USA* **107**, 12011-12016.
- Cho, C. E., Brueggemann, C., L'Etoile, N. D. and Bargmann, C. I. (2016). Parallel encoding of sensory history and behavioral preference during Caenorhabditis elegans olfactory learning. *Elife* **5**, e14000.
- Chun, L., Gong, J., Yuan, F., Zhang, B., Liu, H., Zheng, T., Yu, T., Xu, X. Z. S. and Liu, J. (2015). Metabotropic GABA signalling modulates longevity in C. elegans. *Nat. Commun.* **6**, 8828.
- Cohen, E., Bieschke, J., Perciavalle, R. M., Kelly, J. W. and Dillin, A. (2006). Opposing activities protect against age-onset proteotoxicity. *Science* **313**, 1604-1610.
- Cooper, A. A., Gitler, A. D., Cashikar, A., Haynes, C. M., Hill, K. J., Bhullar, B., Liu, K., Xu, K., Strathearn, K. E., Liu, F. et al. (2006). Alpha-synuclein blocks ER-Golgi traffic and Rab1 rescues neuron loss in Parkinson's models. *Science* **313**, 324-328.
- Corder, E. H., Saunders, A. M., Strittmatter, W. J., Schmechel, D. E., Gaskell, P. C., Small, G. W., Roses, A. D., Haines, J. L. and Pericak-Vance, M. A. (1993). Gene dose of apolipoprotein E type 4 allele and the risk of Alzheimer's disease in late onset families. *Science* **261**, 921-923.
- Corder, E. H., Saunders, A. M., Risch, N. J., Strittmatter, W. J., Schmechel, D. E., Gaskell, P. C., Rimmler, J. B., Locke, P. A., Conneally, P. M., Schmechel, K. E. et al. (1994). Protective effect of apolipoprotein E type 2 allele for late onset Alzheimer disease. *Nat. Genet.* **7**, 180-184.
- Ding, W.-X., Ni, H.-M., Gao, W., Hou, Y.-F., Melan, M. A., Chen, X., Stolz, D. B., Shao, Z.-M. and Yin, X.-M. (2007). Differential effects of endoplasmic reticulum stress-induced autophagy on cell survival. *J. Biol. Chem.* **282**, 4702-4710.
- Dostal, V. and Link, C. D. (2010). Assaying  $\beta$ -amyloid toxicity using a transgenic C. elegans model. *J. Vis. Exp.* e2252.
- Esbjörner, E. K., Chan, F., Rees, E., Erdelyi, M., Luheshi, L. M., Bertoni, C. W., Kaminski, C. F., Dobson, C. M. and Kaminski Schierle, G. S. (2014). Direct observations of amyloid  $\beta$  self-assembly in live cells provide insights into differences in the kinetics of A $\beta$ (1-40) and A $\beta$ (1-42) aggregation. *Chem. Biol.* **21**, 732-742.
- Fay, D. S., Fluet, A., Johnson, C. J. and Link, C. D. (1998). In vivo aggregation of beta-amyloid peptide variants. *J. Neurochem.* **71**, 1616-1625.
- Florez-McClure, M. L., Hohsfield, L. A., Fonte, G., Bealor, M. T. and Link, C. D. (2007). Decreased insulin-receptor signaling promotes the autophagic degradation of beta-amyloid peptide in C. elegans. *Autophagy* **3**, 569-580.
- Fontana, L., Partridge, L. and Longo, V. D. (2010). Extending healthy life span—from yeast to humans. *Science* **328**, 321-326.
- Fonte, V., Kapulkin, W. J., Kapulkin, V., Taft, A., Fluet, A., Friedman, D. and Link, C. D. (2002). Interaction of intracellular beta amyloid peptide with chaperone proteins. *Proc. Natl. Acad. Sci. USA* **99**, 9439-9444.
- Francis, P. T., Sims, N. R., Procter, A. W. and Bowen, D. M. (1993). Cortical pyramidal neuron loss may cause glutamatergic hypoactivity and cognitive impairment in Alzheimer's disease: investigative and therapeutic perspectives. *J. Neurochem.* **60**, 1589-1604.
- Fuku, N., Díaz-Peña, R., Arai, Y., Abe, Y., Zempo, H., Naito, H., Murakami, H., Miyachi, M., Spuch, C., Serra-Rexach, J. A. et al. (2017). Epistasis, physical capacity-related genes and exceptional longevity: FNDC5 gene interactions with candidate genes FOXO3 and APOE. *BMC Genomics* **18**, 803.
- Ganley, I. G., Wong, P.-M., Gammoh, N. and Jiang, X. (2011). Distinct autophagosomal-lysosomal fusion mechanism revealed by thapsigargin-induced autophagy arrest. *Mol. Cell* **42**, 731-743.
- Greenamyre, J. T., Maragos, W. F., Albin, R. L., Penney, J. B. and Young, A. B. (1988). Glutamate transmission and toxicity in Alzheimer's disease. *Prog. Neuropsychopharmacol. Biol. Psychiatry* **12**, 421-430.
- Greer, E. L. and Brunet, A. (2009). Different dietary restriction regimens extend lifespan by both independent and overlapping genetic pathways in C. elegans. *Aging Cell* **8**, 113-127.

- Greer, E. R., Pérez, C. L., Van Gilst, M. R., Lee, B. H. and Ashrafi, K. (2008). Neural and molecular dissection of a *C. elegans* sensory circuit that regulates fat and feeding. *Cell Metab.* **8**, 118-131.
- Griffin, E. F., Caldwell, K. A. and Caldwell, G. A. (2017). Genetic and pharmacological discovery for Alzheimer's disease using *Caenorhabditis elegans*. *ACS Chem. Neurosci.* **8**, 2596-2606.
- Griffin, E. F., Yan, X., Caldwell, K. A. and Caldwell, G. A. (2018). Distinct functional roles of Vps41-mediated neuroprotection in Alzheimer's and Parkinson's disease models of neurodegeneration. *Hum. Mol. Genet.* **27**, 4176-4193.
- Gusarov, I., Pani, B., Gautier, L., Smolentseva, O., Eremina, S., Shamovsky, I., Katkova-Zhukotskaya, O., Mironov, A. and Nudler, E. (2017). Glycogen controls *Caenorhabditis elegans* lifespan and resistance to oxidative stress. *Nat. Commun.* **8**, 15868.
- Hamilton, B., Dong, Y., Shindo, M., Liu, W., Odell, I., Ruvkun, G. and Lee, S. S. (2005). A systematic RNAi screen for longevity genes in *C. elegans*. *Genes Dev.* **19**, 1544-1555.
- Hansen, M., Chandra, A., Mitic, L. L., Onken, B., Driscoll, M. and Kenyon, C. (2008). A role for autophagy in the extension of lifespan by dietary restriction in *C. elegans*. *PLoS Genet.* **4**, e24.
- Harris, F. M., Brecht, W. J., Xu, Q., Tesseur, I., Kekoni, L., Wyss-Coray, T., Fish, J. D., Masliah, E., Hopkins, P. C., Scarse-Levie, K. et al. (2003). Carboxyl-terminal-truncated apolipoprotein E4 causes Alzheimer's disease-like neurodegeneration and behavioral deficits in transgenic mice. *Proc. Natl. Acad. Sci. USA* **100**, 10966-10971.
- Hartmann, H., Eckert, A. and Müller, W. E. (1994). Apolipoprotein E and cholesterol affect neuronal calcium signalling: the possible relationship to beta-amyloid neurotoxicity. *Biochem. Biophys. Res. Commun.* **200**, 1185-1192.
- Hills, T., Brockie, P. J. and Maricq, A. V. (2004). Dopamine and glutamate control area-restricted search behavior in *Caenorhabditis elegans*. *J. Neurosci.* **24**, 1217-1225.
- Hoyer-Hansen, M., Bastholm, L., Szytiarski, P., Campanella, M., Szabadkai, G., Farkas, T., Bianchi, K., Fehrenbacher, N., Elling, F., Rizzuto, R. et al. (2007). Control of macroautophagy by calcium, calmodulin-dependent kinase kinase- $\beta$ , and Bcl-2. *Mol. Cell* **25**, 193-205.
- Hsin, H. and Kenyon, C. (1999). Signals from the reproductive system regulate the lifespan of *C. elegans*. *Nature* **399**, 362-366.
- Hu, X., Crick, S. L., Bu, G., Frieden, C., Pappu, R. V. and Lee, J.-M. (2009). Amyloid seeds formed by cellular uptake, concentration, and aggregation of the amyloid-beta peptide. *Proc. Natl. Acad. Sci. USA* **106**, 20324-20329.
- Hu, J., Liu, C.-C., Chen, X.-F., Zhang, Y.-W., Xu, H. and Bu, G. (2015). Opposing effects of viral mediated brain expression of apolipoprotein E2 (apoE2) and apoE4 on apoE lipidation and A $\beta$  metabolism in apoE4-targeted replacement mice. *Mol. Neurodegener.* **10**, 6.
- Huang, Y. and Mucke, L. (2012). Alzheimer mechanisms and therapeutic strategies. *Cell* **148**, 1204-1222.
- Kenyon, C., Chang, J., Gensch, E., Rudner, A. and Tabtiang, R. (1993). A *C. elegans* mutant that lives twice as long as wild type. *Nature* **366**, 461-464.
- Kim, H., Perentis, R. J., Caldwell, G. A. and Caldwell, K. A. (2018). Gene-by-environment interactions that disrupt mitochondrial homeostasis cause neurodegeneration in *C. elegans* Parkinson's models. *Cell Death Dis.* **9**, 555.
- Kindt, K. S., Viswanath, V., Macpherson, L., Quast, K., Hu, H., Patapoutian, A. and Schafer, W. R. (2007). *Caenorhabditis elegans* TRPA-1 functions in mechanosensation. *Nat. Neurosci.* **10**, 568-577.
- Knight, A. L., Yan, X., Hamamichi, S., Ajjuri, R. R., Mazzulli, J. R., Zhang, M. W., Daigle, J. G., Zhang, S., Borom, A. R., Roberts, L. R. et al. (2014). The glycolytic enzyme, GPI, is a functionally conserved modifier of dopaminergic neurodegeneration in Parkinson's models. *Cell Metab.* **20**, 145-157.
- Kounnas, M. Z., Moir, R. D., Rebeck, G. W., Bush, A. I., Argraves, W. S., Tanzi, R. E., Hyman, B. T. and Strickland, D. K. (1995). LDL receptor-related protein, a multifunctional ApoE receptor, binds secreted  $\beta$ -amyloid precursor protein and mediates its degradation. *Cell* **82**, 331-340.
- Kouroku, Y., Fujita, E., Tanida, I., Ueno, T., Isoai, A., Kumagai, H., Ogawa, S., Kaufman, R. J., Kominami, E. and Momoi, T. (2007). ER stress (PERK/eIF2 $\alpha$  phosphorylation) mediates the polyglutamine-induced LC3 conversion, an essential step for autophagy formation. *Cell Death Differ.* **14**, 230-239.
- Lattanzio, F., Carboni, L., Carretta, D., Rimondini, R., Candelletti, S. and Romualdi, P. (2014). Human apolipoprotein E4 modulates the expression of Pin1, Sirtuin 1, and Presenilin 1 in brain regions of targeted replacement apoE mice. *Neuroscience* **256**, 360-369.
- Lee, B. H. and Ashrafi, K. (2008). A TRPV channel modulates *C. elegans* neurosecretion, larval starvation survival, and adult lifespan. *PLoS Genet.* **4**, e1000213.
- Lee, R. Y., Sawin, E. R., Chalfie, M., Horvitz, H. R. and Avery, L. (1999). EAT-4, a homolog of a mammalian sodium-dependent inorganic phosphate cotransporter, is necessary for glutamatergic neurotransmission in *Caenorhabditis elegans*. *J. Neurosci.* **19**, 159-167.
- Lee, G. D., Wilson, M. A., Zhu, M., Wolkow, C. A., de Cabo, R., Ingram, D. K. and Zou, S. (2006). Dietary deprivation extends lifespan in *Caenorhabditis elegans*. *Aging Cell* **5**, 515-524.
- Lee, D., Jung, S., Ryu, J., Ahnn, J. and Ha, I. (2008). Human vesicular glutamate transporters functionally complement EAT-4 in *C. elegans*. *Mol. Cells* **25**, 50-54.
- Lewerenz, J. and Maher, P. (2015). Chronic glutamate toxicity in neurodegenerative diseases - what is the evidence? *Front. Neurosci.* **9**, 469.
- Li, J., Kanekiyo, T., Shinohara, M., Zhang, Y., LaDu, M. J., Xu, H. and Bu, G. (2012). Differential regulation of amyloid- $\beta$  endocytic trafficking and lysosomal degradation by apolipoprotein E isoforms. *J. Biol. Chem.* **287**, 44593-44601.
- Lin, R., Zhang, Y., Yan, D., Liao, X., Gong, G., Hu, J., Fu, Y. and Cai, W. (2016). Association of common variants in TOMM40/APOE/APOC1 region with human longevity in a Chinese population. *J. Hum. Genet.* **61**, 323-328.
- Link, C. D. (1995). Expression of human beta-amyloid peptide in transgenic *Caenorhabditis elegans*. *Proc. Natl. Acad. Sci. USA* **92**, 9368-9372.
- Link, C. D., Johnson, C. J., Fonte, V., Paupard, M.-C., Hall, D. H., Styren, S., Mathis, C. A. and Klunk, W. E. (2001). Visualization of fibrillar amyloid deposits in living, transgenic *Caenorhabditis elegans* animals using the sensitive amyloid dye, X-34. *Neurobiol. Aging* **22**, 217-226.
- Liu, C.-C., Liu, C.-C., Kanekiyo, T., Xu, H. and Bu, G. (2013a). Apolipoprotein E and Alzheimer disease: risk, mechanisms and therapy. *Nat. Rev. Neurol.* **9**, 106-118.
- Liu, G., Zhang, S., Cai, Z., Ma, G., Zhang, L., Jiang, Y., Feng, R., Liao, M., Chen, Z., Zhao, B. et al. (2013b). PICALM Gene rs3851179 polymorphism contributes to Alzheimer's disease in an asian population. *Neuromolecular Med.* **15**, 384-388.
- Marchi, S., Patergnani, S., Missiroli, S., Morciano, G., Rimessi, A., Wiecekowsk, M. R., Giorgi, C. and Pinton, P. (2018). Mitochondrial and endoplasmic reticulum calcium homeostasis and cell death. *Cell Calcium* **69**, 62-72.
- Martinez, B. A., Kim, H., Ray, A., Caldwell, G. A. and Caldwell, K. A. (2015). A bacterial metabolite induces glutathione-tractable proteostatic damage, proteasomal disturbances, and PINK1-dependent autophagy in *C. elegans*. *Cell Death Dis.* **6**, e1908.
- Martinez, B. A., Caldwell, K. A. and Caldwell, G. A. (2017a). *C. elegans* as a model system to accelerate discovery for Parkinson disease. *Curr. Opin. Genet. Dev.* **44**, 102-109.
- Martinez, B. A., Petersen, D. A., Gaeta, A. L., Stanley, S. P., Caldwell, G. A. and Caldwell, K. A. (2017b). Dysregulation of the mitochondrial unfolded protein response induces non-apoptotic dopaminergic neurodegeneration in *C. elegans* models of Parkinson's Disease. *J. Neurosci.* **37**, 11085-11100.
- Matlack, K. E. S., Tardiff, D. F., Narayan, P., Hamamichi, S., Caldwell, K. A., Caldwell, G. A. and Lindquist, S. (2014). Clioquinol promotes the degradation of metal-dependent amyloid- $\beta$  (A $\beta$ ) oligomers to restore endocytosis and ameliorate A $\beta$  toxicity. *Proc. Natl. Acad. Sci. USA* **111**, 4013-4018.
- Mazzulli, J. R., Xu, Y.-H., Sun, Y., Knight, A. L., McLean, P. J., Caldwell, G. A., Sidransky, E., Grabowski, G. A. and Krainc, D. (2011). Gaucher disease glucocerebrosidase and  $\alpha$ -synuclein form a bidirectional pathogenic loop in synucleinopathies. *Cell* **146**, 37-52.
- McNeill, E., Channon, K. M. and Greaves, D. R. (2010). Inflammatory cell recruitment in cardiovascular disease: murine models and potential clinical applications. *Clin. Sci.* **118**, 641-655.
- Mukherjee, S., Russell, J. C., Carr, D. T., Burgess, J. D., Allen, M., Serie, D. J., Boehme, K. L., Kauwe, J. S. K., Naj, A. C., Fardo, D. W. et al. (2017). Systems biology approach to late-onset Alzheimer's disease genome-wide association study identifies novel candidate genes validated using brain expression data and *Caenorhabditis elegans* experiments. *Alzheimer's Dement.* **13**, 1133-1142.
- Muñoz-Lobato, F., Rodríguez-Palero, M. J., Naranjo-Galindo, F. J., Shephard, F., Gaffney, C. J., Szcwyczyk, N. J., Hamamichi, S., Caldwell, K. A., Caldwell, G. A., Link, C. D. et al. (2014). Protective role of DNJ-27/ERdj5 in *Caenorhabditis elegans* models of human neurodegenerative diseases. *Antioxid. Redox Signal.* **20**, 217-235.
- Naj, A. C., Jun, G., Beecham, G. W., Wang, L.-S., Vardarajan, B. N., Buross, J., Gallins, P. J., Buxbaum, J. D., Jarvik, G. P., Crane, P. K. et al. (2011). Common variants at MS4A4/MS4A6E, CD2AP, CD33 and EPHA1 are associated with late-onset Alzheimer's disease. *Nat. Genet.* **43**, 436-441.
- Nakagawa, T., Zhu, H., Morishima, N., Li, E., Xu, J., Yankner, B. A. and Yuan, J. (2000). Caspase-12 mediates endoplasmic-reticulum-specific apoptosis and cytotoxicity by amyloid- $\beta$ . *Nature* **403**, 98-103.
- Niikura, T., Sidahmed, E., Hirata-Fukae, C., Aisen, P. S. and Matsuoka, Y. (2011). A humanin derivative reduces amyloid beta accumulation and ameliorates memory deficit in triple transgenic mice. *PLoS One* **6**, e16259.
- Okoshi, T., Yamaguchi, I., Ozawa, D., Hasegawa, K. and Naiki, H. (2015). Endocytosed  $\beta$ 2-microglobulin amyloid fibrils induce necrosis and apoptosis of rabbit synovial fibroblasts by disrupting endosomal/lysosomal membranes: a novel mechanism on the cytotoxicity of amyloid fibrils. *PLoS ONE* **10**, e0139330.
- Patergnani, S., Suski, J. M., Agnoletto, C., Bononi, A., Bonora, M., De Marchi, E., Giorgi, C., Marchi, S., Missiroli, S., Poletti, F. et al. (2011). Calcium signaling around mitochondria associated membranes (MAMs). *Cell Commun. Signal.* **9**, 19.
- Qiu, Z., Crutcher, K. A., Hyman, B. T. and Rebeck, G. W. (2003). ApoE isoforms affect neuronal N-methyl-D-aspartate calcium responses and toxicity via receptor-mediated processes. *Neuroscience* **122**, 291-303.
- Ray, A., Martinez, B. A., Berkowitz, L. A., Caldwell, G. A. and Caldwell, K. A. (2014). Mitochondrial dysfunction, oxidative stress, and neurodegeneration

- elicited by a bacterial metabolite in a *C. elegans* Parkinson's model. *Cell Death Dis.* **5**, e984.
- Reger, M. A., Watson, G. S., Frey, W. H., Baker, L. D., Cholerton, B., Keeling, M. L., Belongia, D. A., Fishel, M. A., Plymate, S. R., Schellenberg, G. D. et al.** (2006). Effects of intranasal insulin on cognition in memory-impaired older adults: modulation by APOE genotype. *Neurobiol. Aging* **27**, 451-458.
- Reinders, N. R., Pao, Y., Renner, M. C., da Silva-Matos, C. M., Lodder, T. R., Malinow, R. and Kessels, H. W.** (2016). Amyloid- $\beta$  effects on synapses and memory require AMPA receptor subunit GluA3. *Proc. Natl. Acad. Sci. USA* **113**, E6526-E6534.
- Rosenson, R. S., Brewer, H. B., Barter, P. J., Björkegren, J. L. M., Chapman, M. J., Gaudet, D., Kim, D. S., Niesor, E., Rye, K.-A., Sacks, F. M. et al.** (2017). HDL and atherosclerotic cardiovascular disease: genetic insights into complex biology. *Nat. Rev. Cardiol.* **15**, 9-19.
- Rusiñol, A. E., Cui, Z., Chen, M. H. and Vance, J. E.** (1994). A unique mitochondria-associated membrane fraction from rat liver has a high capacity for lipid synthesis and contains pre-Golgi secretory proteins including nascent lipoproteins. *J. Biol. Chem.* **269**, 27494-27502.
- Sanders, J., Scholz, M., Merutka, I. and Biron, D.** (2017). Distinct unfolded protein responses mitigate or mediate effects of nonlethal deprivation of *C. elegans* sleep in different tissues. *BMC Biol.* **15**, 67.
- Schächter, F., Faure-Delanef, L., Guénot, F., Rouger, H., Froguel, P., Lesueur-Ginot, L. and Cohen, D.** (1994). Genetic associations with human longevity at the APOE and ACE loci. *Nat. Genet.* **6**, 29-32.
- Skillbäck, T., Lautner, R., Mattsson, N., Schott, J. M., Skoog, I., Nägga, K., Kilander, L., Wimo, A., Winblad, B., Eriksdotter, M. et al.** (2018). Apolipoprotein E genotypes and longevity across dementia disorders. *Alzheimer's Dement.* **14**, 895-901.
- Snyder, E. M., Nong, Y., Almeida, C. G., Paul, S., Moran, T., Choi, E. Y., Nairn, A. C., Salter, M. W., Lombroso, P. J., Gouras, G. K. et al.** (2005). Regulation of NMDA receptor trafficking by amyloid- $\beta$ . *Nat. Neurosci.* **8**, 1051-1058.
- Sorrentino, V., Romani, M., Mouchiroud, L., Beck, J. S., Zhang, H., D'Amico, D., Moullan, N., Potenza, F., Schmid, A. W., Rietsch, S. et al.** (2017). Enhancing mitochondrial proteostasis reduces amyloid- $\beta$  proteotoxicity. *Nature* **552**, 187-193.
- Spinney, L.** (2014). Alzheimer's disease: the forgetting gene. *Nature* **510**, 26-28.
- Sreekumar, P. G., Hinton, D. R. and Kannan, R.** (2017). Endoplasmic reticulum-mitochondrial crosstalk: a novel role for the mitochondrial peptide humanin. *Neural Regen. Res.* **12**, 35-38.
- Stavoe, A. K. H., Hill, S. E., Hall, D. H. and Colón-Ramos, D. A.** (2016). KIF1A/UNC-104 transports ATG-9 to regulate neurodevelopment and autophagy at synapses. *Dev. Cell* **38**, 171-185.
- Steinkraus, K. A., Smith, E. D., Davis, C., Carr, D., Pendergrass, W. R., Sutphin, G. L., Kennedy, B. K. and Kaerberlein, M.** (2008). Dietary restriction suppresses proteotoxicity and enhances longevity by an hsf-1-dependent mechanism in *Caenorhabditis elegans*. *Aging Cell* **7**, 394-404.
- Su, L. J., Auluck, P. K., Outeiro, T. F., Yeger-Lotem, E., Kritzer, J. A., Tardiff, D. F., Strathearn, K. E., Liu, F., Cao, S., Hamamichi, S. et al.** (2010). Compounds from an unbiased chemical screen reverse both ER-to-Golgi trafficking defects and mitochondrial dysfunction in Parkinson's disease models. *Dis. Model. Mech.* **3**, 194-208.
- Sun, F., Xu, X., Wang, X. and Zhang, B.** (2016). Regulation of autophagy by Ca2. *Tumour Biol.* **37**, 15467.
- Takahashi, R. H., Milner, T. A., Li, F., Nam, E. E., Edgar, M. A., Yamaguchi, H., Beal, M. F., Xu, H., Greengard, P. and Gouras, G. K.** (2002). Intraneuronal Alzheimer abeta42 accumulates in multivesicular bodies and is associated with synaptic pathology. *Am. J. Pathol.* **161**, 1869-1879.
- Talbot, C., Lendon, C., Craddock, N., Shears, S., Morris, J. C. and Goate, A.** (1994). Protection against Alzheimer's disease with apoE epsilon 2. *Lancet (London, England)* **343**, 1432-1433.
- Tambini, M. D., Pera, M., Kanter, E., Yang, H., Guardia-Laguarta, C., Holtzman, D., Sulzer, D., Area-Gomez, E. and Schon, E. A.** (2016). ApoE4 upregulates the activity of mitochondria-associated ER membranes. *EMBO Rep.* **17**, 27-36.
- Tardiff, D. F., Tucci, M. L., Caldwell, K. A., Caldwell, G. A. and Lindquist, S.** (2012). Different 8-hydroxyquinolines protect models of TDP-43 protein,  $\alpha$ -synuclein, and polyglutamine proteotoxicity through distinct mechanisms. *J. Biol. Chem.* **287**, 4107-4120.
- Tardiff, D. F., Jui, N. T., Khurana, V., Tambe, M. A., Thompson, M. L., Chung, C. Y., Kamadurai, H. B., Kim, H. T., Lancaster, A. K., Caldwell, K. A. et al.** (2013). Yeast reveal a "druggable" Rsp5/Nedd4 network that ameliorates  $\alpha$ -synuclein toxicity in neurons. *Science* **342**, 979-983.
- Tardiff, D. F., Brown, L. E., Yan, X., Trilles, R., Jui, N. T., Barrasa, M. I., Caldwell, K. A., Caldwell, G. A., Schaus, S. E. and Lindquist, S.** (2017). Dihydropyrimidine-thiones and cloquinol synergize to target  $\beta$ -amyloid cellular pathologies through a metal-dependent mechanism. *ACS Chem. Neurosci.* **8**, 2039-2055.
- Theendakara, V., Patent, A., Peters Libeu, C. A., Philpot, B., Flores, S., Descamps, O., Poksay, K. S., Zhang, Q., Cailing, G., Hart, M. et al.** (2013). Neuroprotective Sirtuin ratio reversed by ApoE4. *Proc. Natl. Acad. Sci. USA* **110**, 18303-18308.
- Theendakara, V., Peters-Libeu, C. A., Spilman, P., Poksay, K. S., Bredesen, D. E. and Rao, R. V.** (2016). Direct transcriptional effects of apolipoprotein E. *J. Neurosci.* **36**, 685-700.
- Thompson, M. L., Chen, P., Yan, X., Kim, H., Borom, A. R., Roberts, N. B., Caldwell, K. A. and Caldwell, G. A.** (2014). TorsinA rescues ER-associated stress and locomotive defects in *C. elegans* models of ALS. *Dis. Model. Mech.* **7**, 233-243.
- Tolar, M., Keller, J. N., Chan, S., Mattson, M. P., Marques, M. A. and Crutcher, K. A.** (1999). Truncated apolipoprotein E (ApoE) causes increased intracellular calcium and may mediate ApoE neurotoxicity. *J. Neurosci.* **19**, 7100-7110.
- Treusch, S., Hamamichi, S., Goodman, J. L., Matlack, K. E. S., Chung, C. Y., Baru, V., Shulman, J. M., Parrado, A., Bevis, B. J., Valastyan, J. S. et al.** (2011). Functional links between A $\beta$  toxicity, endocytic trafficking, and Alzheimer's disease risk factors in yeast. *Science* **334**, 1241-1245.
- Ulrich, D.** (2015). Amyloid- $\beta$  impairs synaptic inhibition via GABAA receptor endocytosis. *J. Neurosci.* **35**, 9205-9210.
- Vahdati Nia, B., Kang, C., Tran, M. G., Lee, D. and Murakami, S.** (2017). Meta analysis of human alzgene database: benefits and limitations of using *C. elegans* for the study of Alzheimer's disease and co-morbid conditions. *Front. Genet.* **8**, 55.
- Verghese, P. B., Castellano, J. M., Garai, K., Wang, Y., Jiang, H., Shah, A., Bu, G., Frieden, C. and Holtzman, D. M.** (2013). ApoE influences amyloid- $\beta$  (A $\beta$ ) clearance despite minimal apoE/A $\beta$  association in physiological conditions. *Proc. Natl. Acad. Sci. USA* **110**, E1807-E1816.
- Wang, H.-Y., Lee, D. H. S., Davis, C. B. and Shank, R. P.** (2000). Amyloid peptide Abeta(1-42) binds selectively and with picomolar affinity to alpha7 nicotinic acetylcholine receptors. *J. Neurochem.* **75**, 1155-1161.
- Xiao, R., Chun, L., Ronan, E. A., Friedman, D. I., Liu, J. and Xu, X. Z. S.** (2015). RNAi Interrogation of dietary modulation of development, metabolism, behavior, and aging in *C. elegans*. *Cell Rep.* **11**, 1123-1133.
- Xu, Q., Bernardo, A., Walker, D., Kanegawa, T., Mahley, R. W. and Huang, Y.** (2006). Profile and regulation of apolipoprotein E (ApoE) expression in the CNS in mice with targeting of green fluorescent protein gene to the ApoE locus. *J. Neurosci.* **26**, 4985-4994.
- Yamauchi, K., Ebihara, Y. and Kawakami, Y.** (2017). Redox status of serum apolipoprotein E and its impact on HDL cholesterol levels. *Clin. Biochem.* **50**, 777-783.
- Yang, A. J., Chandswangbhuvana, D., Margol, L. and Glabe, C. G.** (1998). Loss of endosomal/lysosomal membrane impermeability is an early event in amyloid A $\beta$ 1-42 pathogenesis. *J. Neurosci. Res.* **52**, 691-698.
- Yen, K., Le, T. T., Bansal, A., Narasimhan, S. D., Cheng, J.-X. and Tissenbaum, H. A.** (2010). A comparative study of fat storage quantitation in nematode *Caenorhabditis elegans* using label and label-free methods. *PLoS ONE* **5**, e12810.
- Zhang, S., Arnadottir, J., Keller, C., Caldwell, G. A., Yao, C. A. and Chalfie, M.** (2004). MEC-2 is recruited to the putative mechanosensory complex in *C. elegans* touch receptor neurons through its stomatin-like domain. *Curr. Biol.* **14**, 1888-1896.
- Zhang, H., Wu, J. and Zhu, J.** (2010). The role of apolipoprotein E in Guillain-Barré syndrome and experimental autoimmune neuritis. *J. Biomed. Biotechnol.* **2010**, 1-12.
- Zhao, Z., Sagare, A. P., Ma, Q., Halliday, M. R., Kong, P., Kisler, K., Winkler, E. A., Ramanathan, A., Kanekiyo, T., Bu, G. et al.** (2015). Central role for PICALM in amyloid- $\beta$  blood-brain barrier transcytosis and clearance. *Nat. Neurosci.* **18**, 978-987.
- Zheng, Y., Brockie, P. J., Mellem, J. E., Madsen, D. M. and Maricq, A. V.** (1999). Neuronal control of locomotion in *C. elegans* is modified by a dominant mutation in the GLR-1 ionotropic glutamate receptor. *Neuron* **24**, 347-361.
- Zhong, N., Ramaswamy, G. and Weisgraber, K. H.** (2009). Apolipoprotein E4 domain interaction induces endoplasmic reticulum stress and impairs astrocyte function. *J. Biol. Chem.* **284**, 27273-27280.
- Zwaal, R. R., Van Baelen, K., Groenen, J. T. M., van Geel, A., Rottiers, V., Kaletta, T., Dode, L., Raeymaekers, L., Wuytack, F. and Bogaert, T.** (2001). The sarco-endoplasmic reticulum Ca<sup>2+</sup> ATPase Is required for development and muscle function in *Caenorhabditis elegans*. *J. Biol. Chem.* **276**, 43557-43563.
